# Supplementary material for: A multigene mutation classification of 468 colorectal cancers reveals a prognostic role for APC
Source: PubMed Central journal article supplement (PMC4912618; doi:10.1038/ncomms11743), 2016-06-15
Supplement: ncomms11743-s1.pdf [file ncomms11743-s1.pdf]

SUPPLEMENTARY FIGURES

A

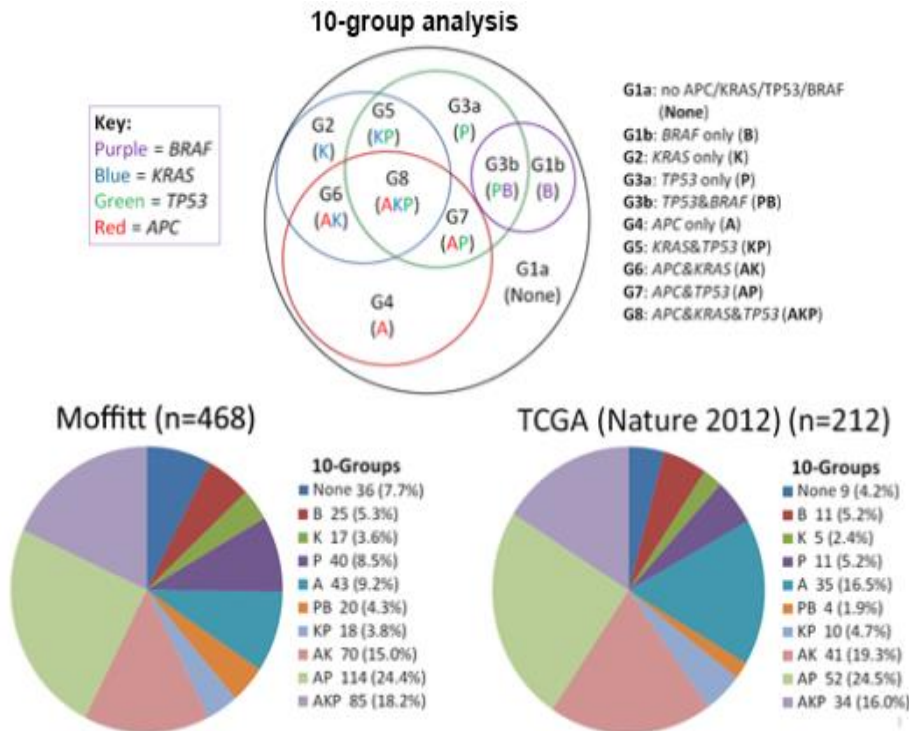

B

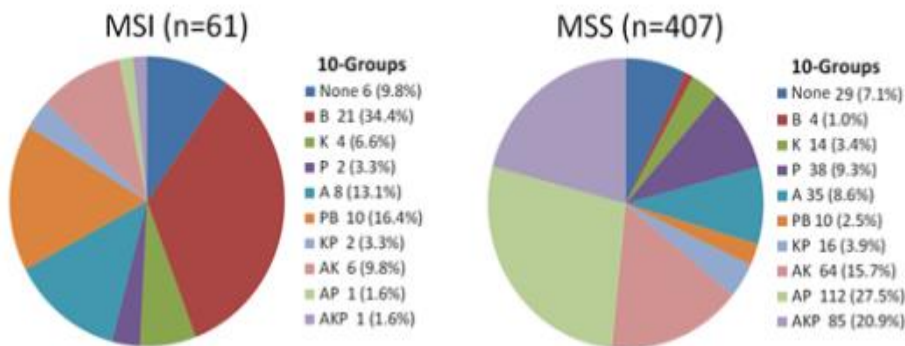

**Supplementary Figure 1. The 10-group analysis of colorectal cancer.** 10 groups were formed according to the pairwise, statistically significant, positive or negative correlations between somatic mutations of four driver genes *APC*, *KRAS*, *TP53* and *BRAF*. Presence or absence of *APC*, *KRAS*, and *TP53* mutations would define eight possible combinatorial groups; *BRAF*-mutated tumors only comprise two additional significant groups (i.e. *BRAF* only and *TP53* &

*BRAF*), given its strong anti-associations with *KRAS* (with which it did not co-occur), and *APC*. Notably, a significant relationship between *BRAF* and *TP53* was also reported by another group<sup>1</sup>. “None” – a group of tumors not having the four driver mutations in our analysis. **(A)** The distribution of *APC*, *KRAS*, *TP53* and/or *BRAF* mutations in each group in the Moffitt (n = 468) and TCGA (n = 212)<sup>2</sup> datasets. **(B)** The mutation distribution in each group in the Moffitt MSI (n = 61) and MSS (n = 407) tumors.

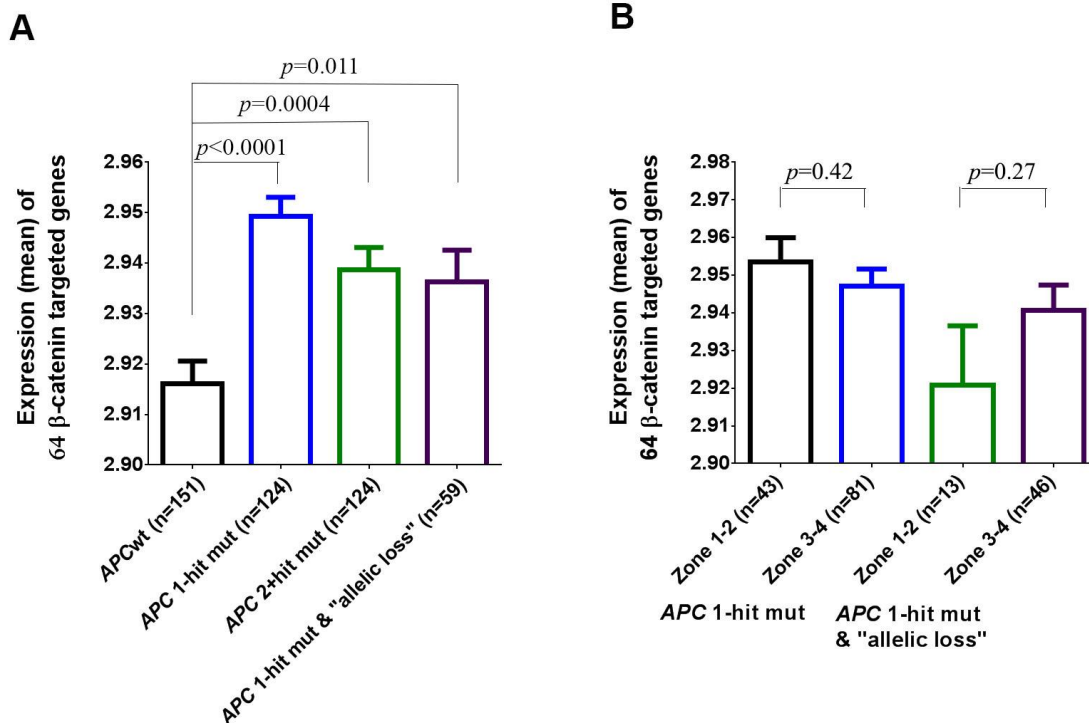

**Supplementary Figure 2. Expression of  $\beta$ -catenin targeted genes in APC groups (n=458, 10 samples without suitable microarray data were excluded from 468 CRCs). (A) The mean mRNA (log<sub>2</sub>) expression of 64  $\beta$ -catenin targeted genes<sup>3</sup> relative to each of four APC subgroups. (B) Comparison of expression of WNT targets between zone 1-2 mutations and zone 3-4 mutations in APC one mutation tumors without or with inferred allelic loss. Error bars represent standard errors (SEM). *p* values were obtained from two-tailed, unequal variance Welch *t* test.**

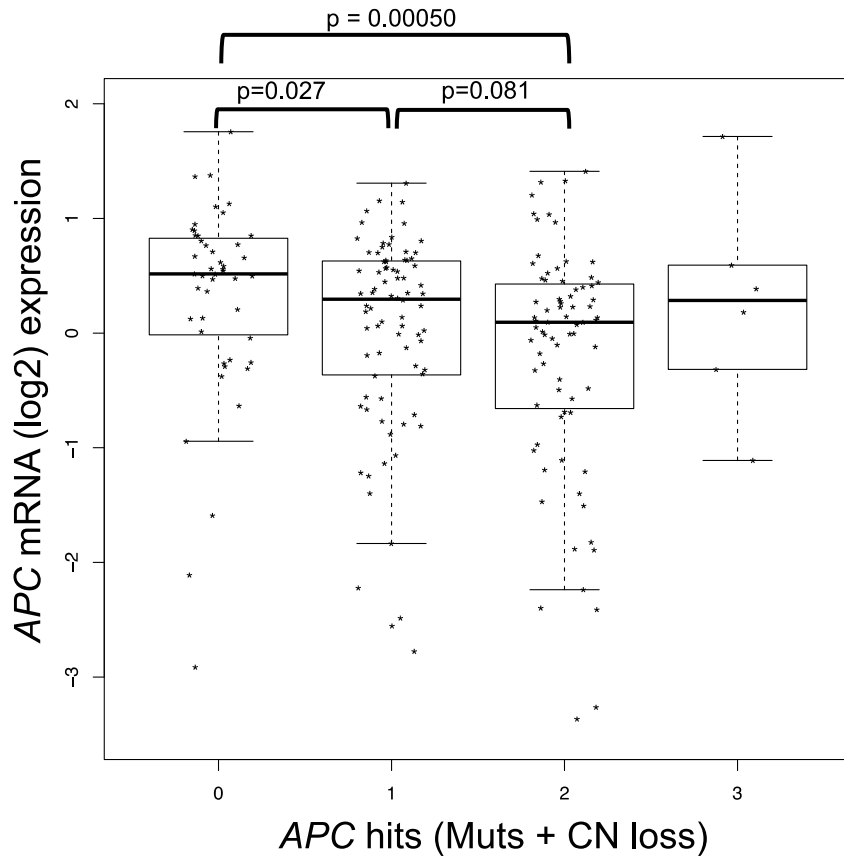

**Supplementary Figure 3. *APC* mRNA expression by derived hits in TCGA CRCs<sup>2</sup>** for which 209 samples had data of mutation, CNA and RNAseq expression. The mean of log2 rpkms was used for mRNA expression of *APC*. CN loss represents copy number loss. *p* values were obtained by the exact Wilcoxon rank sum test. The bolded horizontal lines indicate the median value, the top and bottom box edge indicate the third and first quartiles, respectively, and the whiskers indicate the most extreme data point no more than 1.5 times the interquartile range.

These all correlated across samples: 0.964-0.978 (against cg15020645)

This one different from others: correlation across samples: 0.52

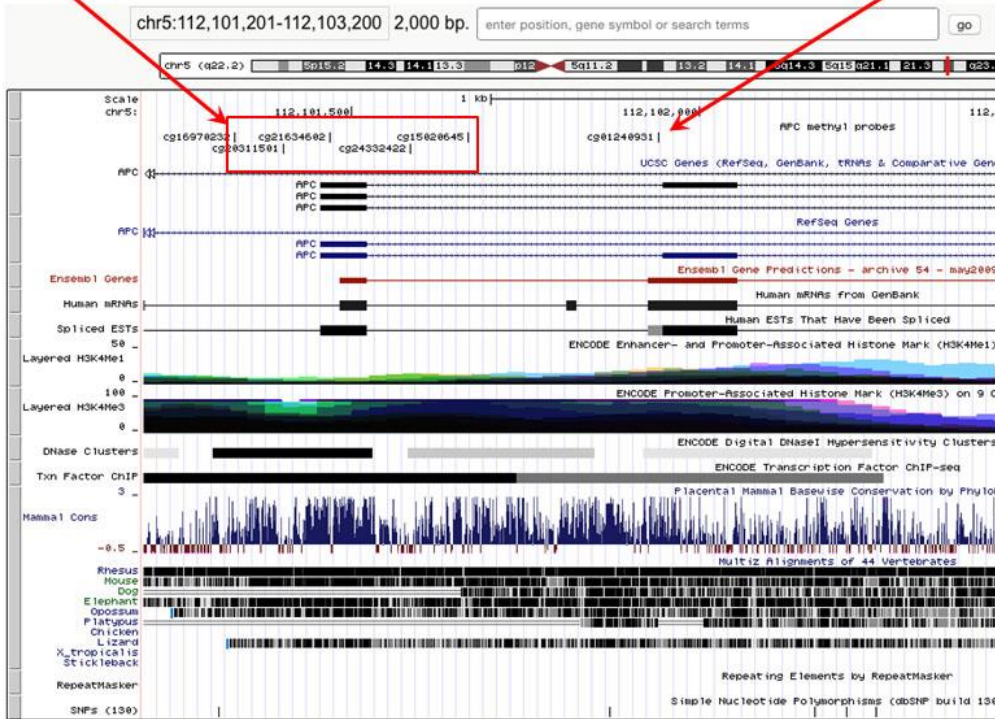

**Supplementary Figure 4. APC methylation probes used in TCGA CRCs <sup>2</sup>.**

A UCSC Genome browser (<http://genome.ucsc.edu/>) illustrating the location of 6 APC methylation probes relative to the gene model itself. Note that 5 probes localize to the gene start, and 1 probe is localized further into the gene body.

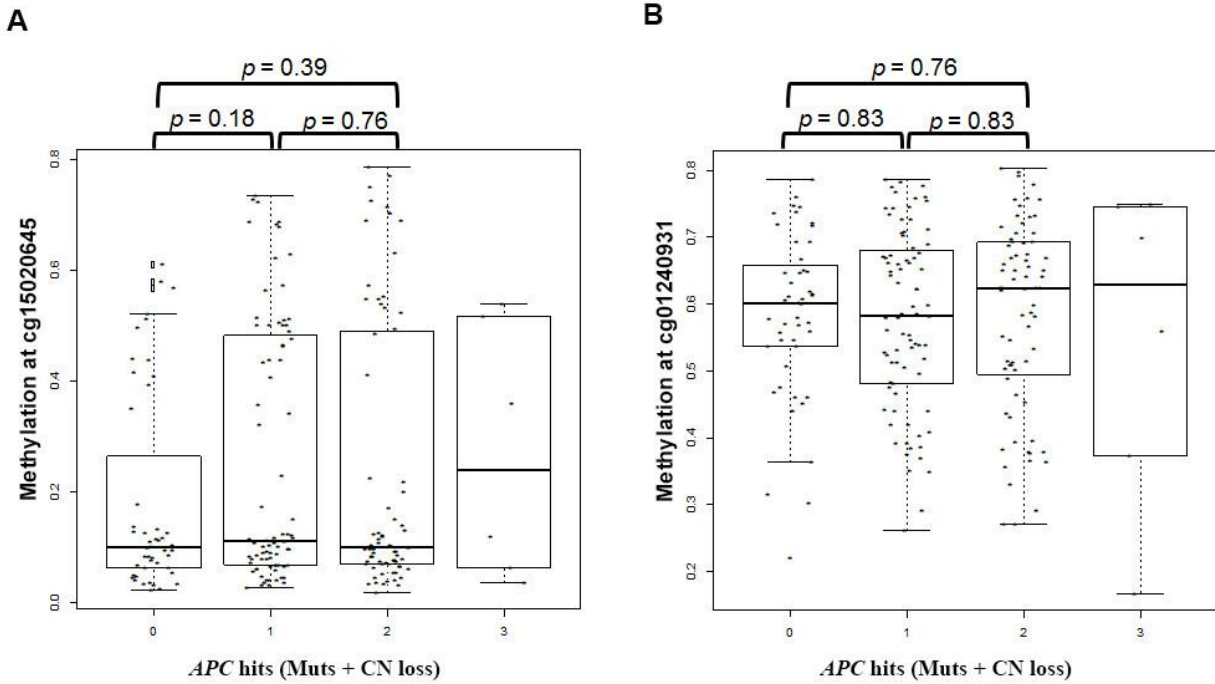

**Supplementary Figure 5. APC methylation by derived hits in TCGA CRCs <sup>2</sup>.** (A) APC probe cg15020645 (promoter region). (B) APC probe cg01240931 (within gene). CN loss represents copy number loss. *p* values were obtained by exact Wilcoxon rank sum test. The bolded horizontal lines indicate the median value, the top and bottom box edge indicate the third and first quartiles, respectively, and the whiskers indicate the most extreme data point no more than 1.5 times the interquartile range.

**A.**

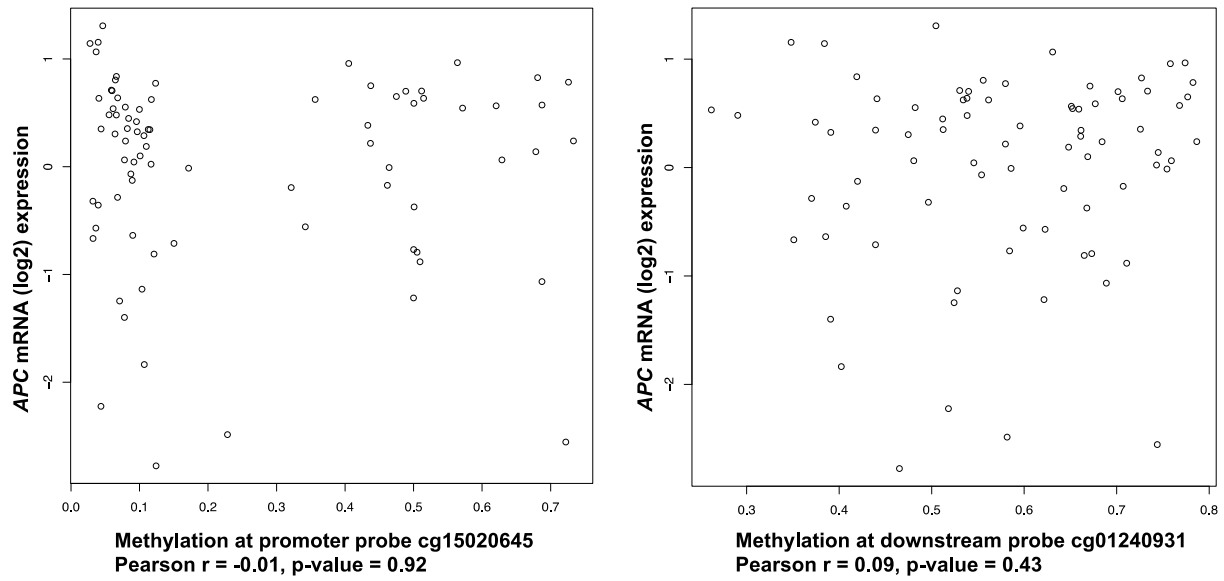

**B.**

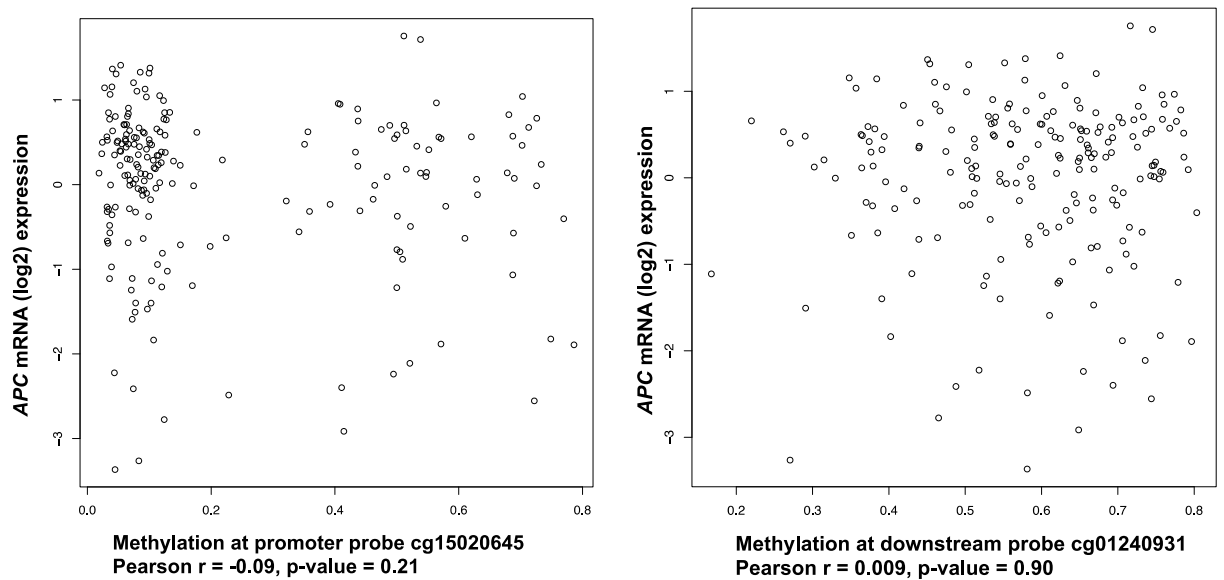

**Supplementary Figure 6. APC expression versus methylation in TCGA CRCs<sup>2</sup>.**

(A) 1-hit samples. (B) All samples. No significant correlation was observed for either probe in either 1-hit or all samples.

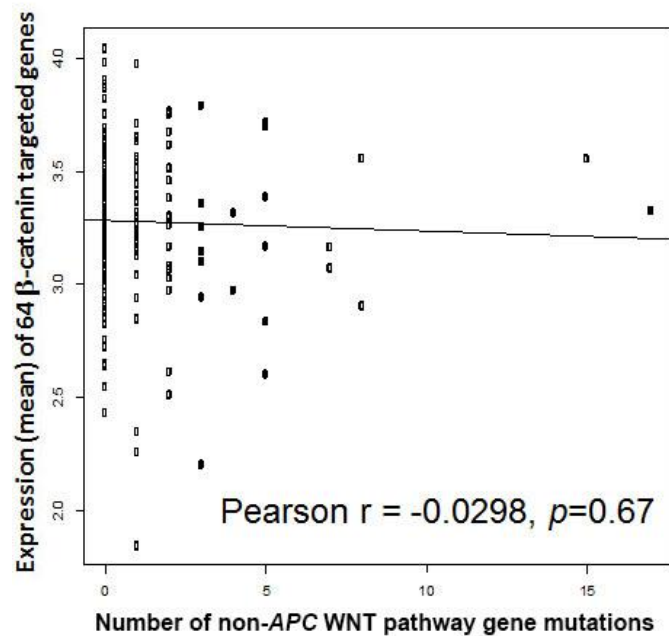

**Supplementary Figure 7. Correlation of the expression of the 64  $\beta$ -catenin targeted genes<sup>3</sup> versus the number of non-APC WNT pathway gene mutations (63 genes examined) in TCGA CRCs<sup>2</sup>. The mean of log<sub>2</sub> rpkm was used for mRNA expression of the 64 genes.**



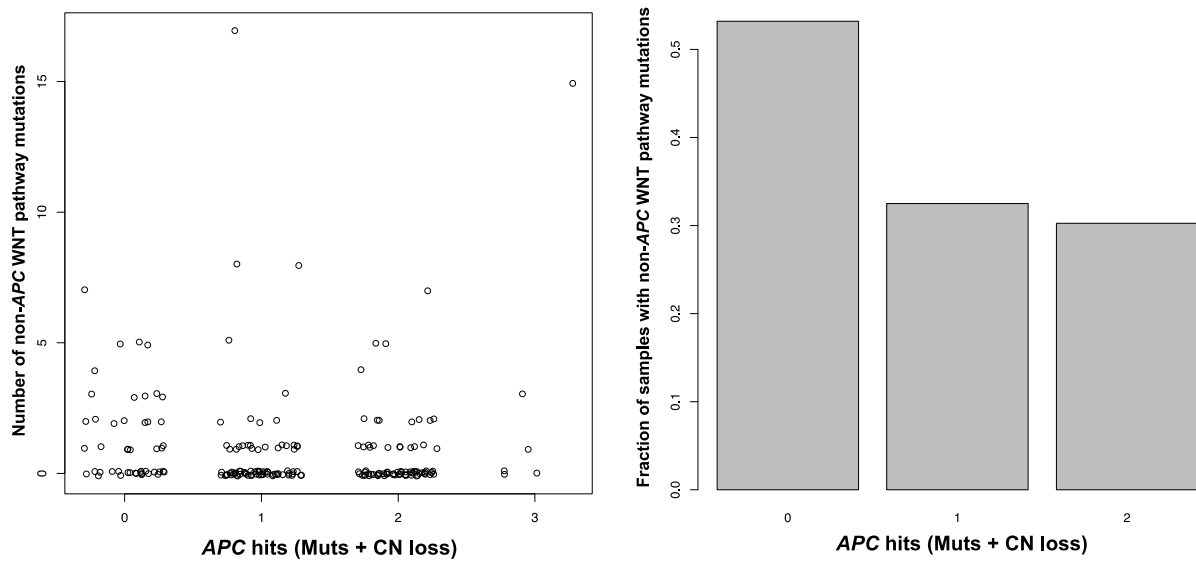

**Supplementary Figure 8. non-APC WNT pathway gene mutations (63 genes examined) across derived hits in TCGA CRCs<sup>2</sup>.** Left: Number of non-APC WNT pathway mutations observed in each APC hit class. Right: Fraction of samples with non-APC WNT pathway mutations in each APC hit class.

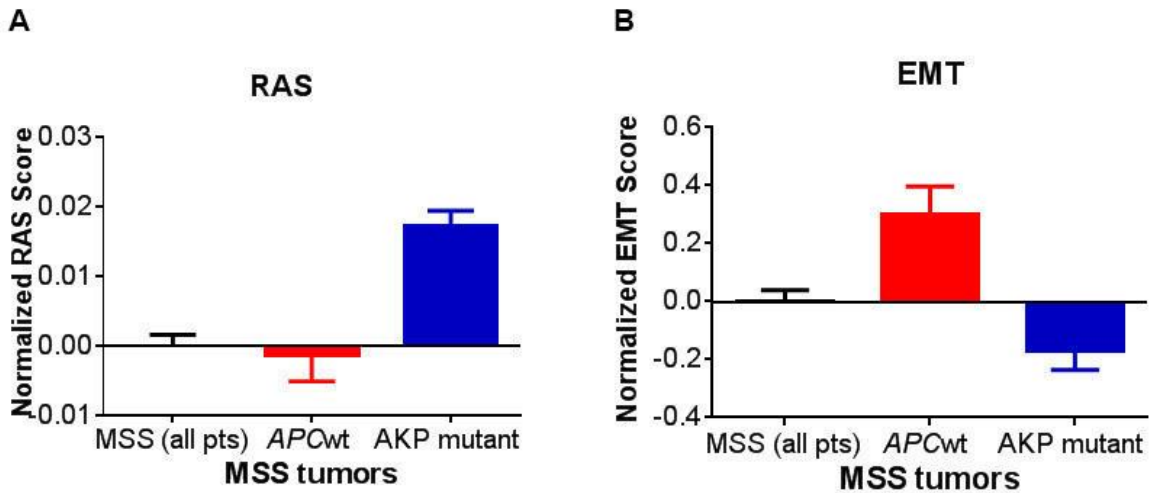

**Supplementary Figure 9. Comparison of the RAS<sub>AZ</sub><sup>4</sup> (A) or EMT<sup>5</sup> (B) signature scores between MSS tumors containing wild type *APC* (n=156) and the AKP (*APC*, *KRAS*, *TP53*) triple mutant (n=85). The scores were normalized by the average scores of all 407 MSS tumors (from total 468 all patient samples) which were used as references and set to be zero. Error bars represent standard errors (SEM). The two-tailed, unequal variance Welch *t* test was used to assess the statistical significance of comparison,  $p < 0.0001$  for both RAS/MAKP and EMT scores as compared between *APC*wt and AKP mutant groups.**

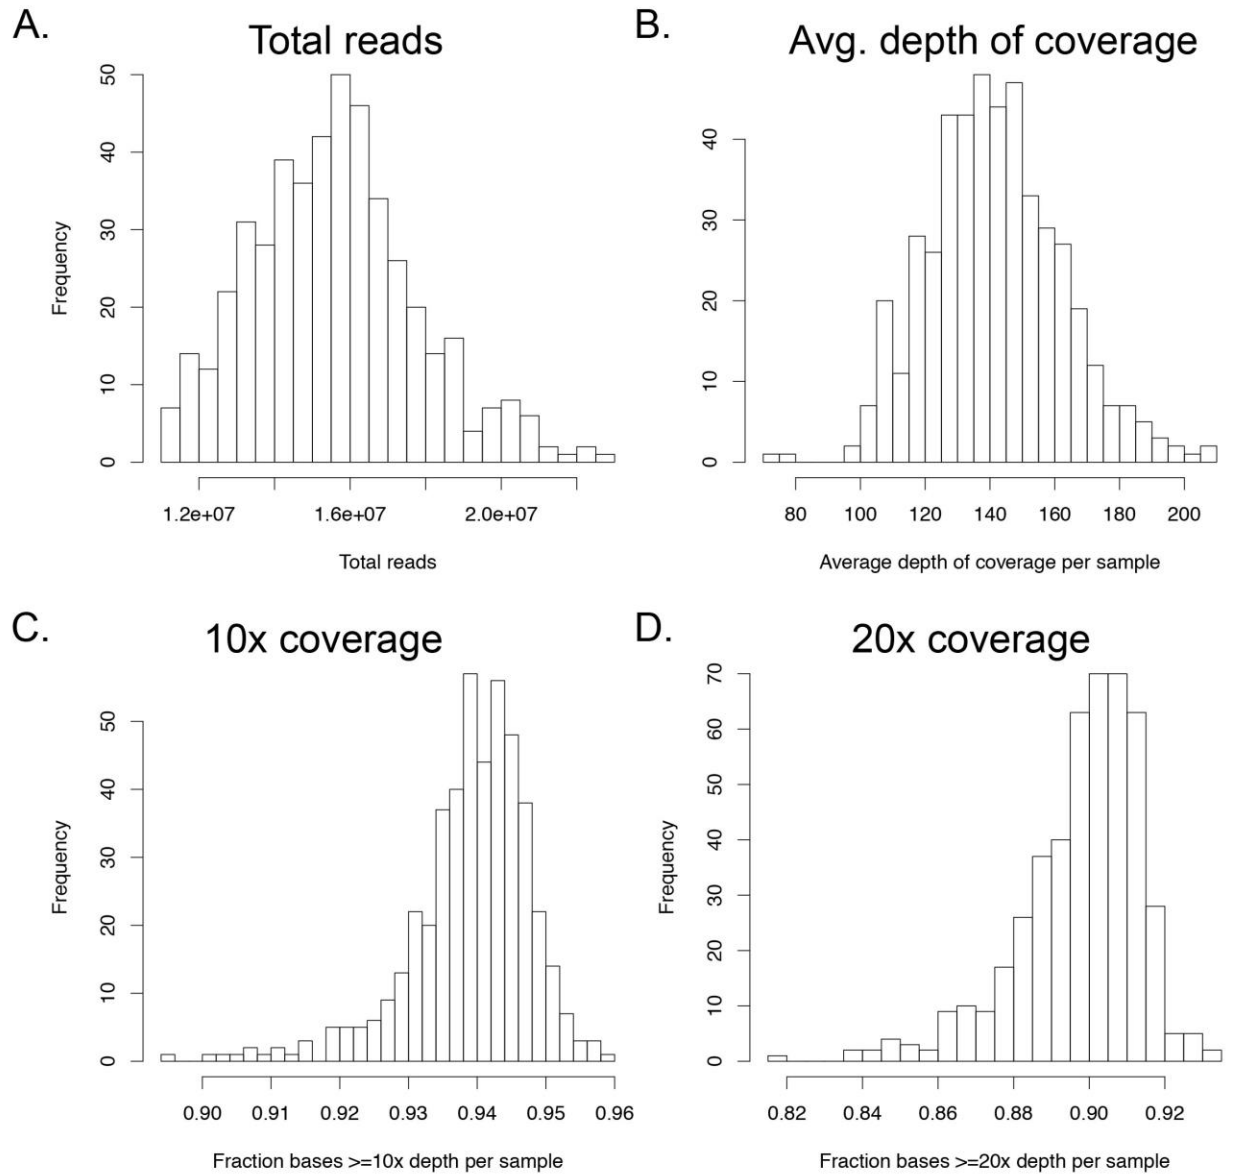

**Supplementary Figure 10. Sequencing metrics.** (A) Distribution of total sequenced reads across sample. (B) Distribution of average final depth of coverage. (C) Distribution of fraction targeted bases covered by  $\geq 10$  reads (D)  $\geq 20$  reads.

**SUPPLEMENTARY TABLES (Supplementary Tables 2 and 8 are attached as separate EXCEL files)**

**Supplementary Table 1. List of 1321 genes in targeted gene sequencing**

|                 |                 |                |                |                  |                 |                 |                 |
|-----------------|-----------------|----------------|----------------|------------------|-----------------|-----------------|-----------------|
| <i>ABCA1</i>    | <i>ABCA3</i>    | <i>ABCB1</i>   | <i>ABCC2</i>   | <i>ABCC3</i>     | <i>ABCC4</i>    | <i>ABL1</i>     | <i>ABL2</i>     |
| <i>ACAP1</i>    | <i>ACVR1B</i>   | <i>ACVR2A</i>  | <i>ADA</i>     | <i>ADAM17</i>    | <i>ADAM29</i>   | <i>ADAM33</i>   | <i>ADAMTS18</i> |
| <i>ADAMTS20</i> | <i>ADAMTSL3</i> | <i>ADCY1</i>   | <i>ADCY9</i>   | <i>ADH7</i>      | <i>ADHFE1</i>   | <i>ADORA2A</i>  | <i>ADORA2B</i>  |
| <i>ADRA1A</i>   | <i>ADRB3</i>    | <i>AFF4</i>    | <i>AKAP6</i>   | <i>AKAP9</i>     | <i>AKT1</i>     | <i>AKT1S1</i>   | <i>AKT2</i>     |
| <i>AKT3</i>     | <i>ALK</i>      | <i>ALOX12B</i> | <i>ALOX15</i>  | <i>ALPK2</i>     | <i>ALPK3</i>    | <i>ALS2</i>     | <i>ANAPC5</i>   |
| <i>ANKRD32</i>  | <i>ANO1</i>     | <i>APAF1</i>   | <i>APBB1IP</i> | <i>APC</i>       | <i>APC2</i>     | <i>APEX1</i>    | <i>APOB</i>     |
| <i>AR</i>       | <i>ARAF</i>     | <i>ARAP3</i>   | <i>AREG</i>    | <i>ARFRP1</i>    | <i>ARHGAP26</i> | <i>ARHGAP29</i> | <i>ARHGAP6</i>  |
| <i>ARHGFE11</i> | <i>ARHGFE12</i> | <i>ARID1A</i>  | <i>ARID3A</i>  | <i>ARNT</i>      | <i>ARRB1</i>    | <i>ASXL1</i>    | <i>ATG10</i>    |
| <i>ATG12</i>    | <i>ATG16L1</i>  | <i>ATG16L2</i> | <i>ATG2B</i>   | <i>ATG4D</i>     | <i>ATG5</i>     | <i>ATG9B</i>    | <i>ATM</i>      |
| <i>ATOH1</i>    | <i>ATP8B1</i>   | <i>ATR</i>     | <i>ATRX</i>    | <i>AURKA</i>     | <i>AURKB</i>    | <i>AURKC</i>    | <i>AXIN1</i>    |
| <i>AXIN2</i>    | <i>AXL</i>      | <i>AZI2</i>    | <i>BAD</i>     | <i>BAI1</i>      | <i>BAI2</i>     | <i>BAI3</i>     | <i>BAK1</i>     |
| <i>BAP1</i>     | <i>BARD1</i>    | <i>BAT1</i>    | <i>BAX</i>     | <i>BAZ1A</i>     | <i>BBC3</i>     | <i>BCAT1</i>    | <i>BCL10</i>    |
| <i>BCL11A</i>   | <i>BCL2</i>     | <i>BCL2A1</i>  | <i>BCL2L1</i>  | <i>BCL2L11</i>   | <i>BCL2L14</i>  | <i>BCL2L15</i>  | <i>BCL2L2</i>   |
| <i>BCL3</i>     | <i>BCL6</i>     | <i>BCL9</i>    | <i>BCL9L</i>   | <i>BCORL1</i>    | <i>BCR</i>      | <i>BECN1</i>    | <i>BID</i>      |
| <i>BIK</i>      | <i>BIRC2</i>    | <i>BIRC3</i>   | <i>BIRC5</i>   | <i>BIRC6</i>     | <i>BIRC7</i>    | <i>BLM</i>      | <i>BMF</i>      |
| <i>BMI1</i>     | <i>BMP2</i>     | <i>BMP4</i>    | <i>BMPR1A</i>  | <i>BMPR1B</i>    | <i>BMPR2</i>    | <i>BMX</i>      | <i>BNIP3</i>    |
| <i>BOK</i>      | <i>BPTF</i>     | <i>BRAF</i>    | <i>BRCA1</i>   | <i>BRCA2</i>     | <i>BRD2</i>     | <i>BRD3</i>     | <i>BRIP1</i>    |
| <i>BTG2</i>     | <i>BTK</i>      | <i>BTRC</i>    | <i>BUB1</i>    | <i>C10orf137</i> | <i>C12orf63</i> | <i>C1orf144</i> | <i>C9orf96</i>  |
| <i>CA12</i>     | <i>CA9</i>      | <i>CABLES1</i> | <i>CAD</i>     | <i>CALCR</i>     | <i>CALCRL</i>   | <i>CARD11</i>   | <i>CASC5</i>    |
| <i>CASK</i>     | <i>CASP2</i>    | <i>CASP8</i>   | <i>CASP9</i>   | <i>CAV1</i>      | <i>CBFA2T3</i>  | <i>CBL</i>      | <i>CBLB</i>     |
| <i>CBLC</i>     | <i>CBX4</i>     | <i>CBX7</i>    | <i>CBX8</i>    | <i>CCBP2</i>     | <i>CCDC63</i>   | <i>CCDC82</i>   | <i>CCKAR</i>    |
| <i>CCKBR</i>    | <i>CCL18</i>    | <i>CCL2</i>    | <i>CCL8</i>    | <i>CCNA1</i>     | <i>CCNA2</i>    | <i>CCND1</i>    | <i>CCND2</i>    |
| <i>CCND3</i>    | <i>CCNDBP1</i>  | <i>CCNE1</i>   | <i>CCNE2</i>   | <i>CCR3</i>      | <i>CCR5</i>     | <i>CD14</i>     | <i>CD22</i>     |
| <i>CD248</i>    | <i>CD33</i>     | <i>CD34</i>    | <i>CD4</i>     | <i>CD44</i>      | <i>CD79A</i>    | <i>CD79B</i>    | <i>CD8A</i>     |
| <i>CDC25A</i>   | <i>CDC25B</i>   | <i>CDC25C</i>  | <i>CDC42</i>   | <i>CDC42BPA</i>  | <i>CDC42BPB</i> | <i>CDC6</i>     | <i>CDC7</i>     |
| <i>CDC73</i>    | <i>CDH1</i>     | <i>CDH11</i>   | <i>CDH2</i>    | <i>CDH20</i>     | <i>CDH5</i>     | <i>CDK1</i>     | <i>CDK12</i>    |
| <i>CDK19</i>    | <i>CDK2</i>     | <i>CDK4</i>    | <i>CDK5</i>    | <i>CDK6</i>      | <i>CDK7</i>     | <i>CDK8</i>     | <i>CDK9</i>     |
| <i>CDKL2</i>    | <i>CDKN1A</i>   | <i>CDKN1B</i>  | <i>CDKN1C</i>  | <i>CDKN2A</i>    | <i>CDKN2B</i>   | <i>CDKN2C</i>   | <i>CDKN2D</i>   |
| <i>CDKN3</i>    | <i>CDS1</i>     | <i>CEBPA</i>   | <i>CELSR1</i>  | <i>CELSR2</i>    | <i>CENPF</i>    | <i>CEP110</i>   | <i>CES3</i>     |
| <i>CHD5</i>     | <i>CHD8</i>     | <i>CHEK1</i>   | <i>CHEK2</i>   | <i>CHIC2</i>     | <i>CHKA</i>     | <i>CHKB</i>     | <i>CHRNA3</i>   |
| <i>CHRNA5</i>   | <i>CHRNB4</i>   | <i>CHUK</i>    | <i>CIC</i>     | <i>CLSPN</i>     | <i>CLTC</i>     | <i>CLU</i>      | <i>CMAS</i>     |
| <i>CNTD2</i>    | <i>CNTN1</i>    | <i>COL11A1</i> | <i>COL14A1</i> | <i>COL1A1</i>    | <i>COL7A1</i>   | <i>CREBBP</i>   | <i>CRHR1</i>    |
| <i>CRKL</i>     | <i>CRLF2</i>    | <i>CSDA</i>    | <i>CSF1R</i>   | <i>CSK</i>       | <i>CSMD3</i>    | <i>CSNK1G2</i>  | <i>CTDP1</i>    |
| <i>CTNNA1</i>   | <i>CTNNB1</i>   | <i>CTNND2</i>  | <i>CTSH</i>    | <i>CUBN</i>      | <i>CX3CR1</i>   | <i>CXCR4</i>    | <i>CXorf30</i>  |
| <i>CYB5D2</i>   | <i>CYLD</i>     | <i>CYP1B1</i>  | <i>CYP2C19</i> | <i>CYP2C8</i>    | <i>CYP2D6</i>   | <i>CYP3A4</i>   | <i>CYP3A5</i>   |
| <i>DAB2</i>     | <i>DAXX</i>     | <i>DBF4</i>    | <i>DBF4B</i>   | <i>DBN1</i>      | <i>DCC</i>      | <i>DCLK3</i>    | <i>DCLRE1C</i>  |
| <i>DDB1</i>     | <i>DDB2</i>     | <i>DDIT3</i>   | <i>DDR1</i>    | <i>DDR2</i>      | <i>DDX1</i>     | <i>DDX10</i>    | <i>DDX11</i>    |
| <i>DGKA</i>     | <i>DGKB</i>     | <i>DGKG</i>    | <i>DGKZ</i>    | <i>DIP2C</i>     | <i>DIS3</i>     | <i>DKK1</i>     | <i>DLC1</i>     |
| <i>DLG1</i>     | <i>DLL1</i>     | <i>DLL3</i>    | <i>DLL4</i>    | <i>DNAH8</i>     | <i>DNAJC24</i>  | <i>DNMT1</i>    | <i>DNMT3A</i>   |
| <i>DNMT3B</i>   | <i>DNTT</i>     | <i>DOK1</i>    | <i>DOT1L</i>   | <i>DPYSL4</i>    | <i>DTX1</i>     | <i>DUSP1</i>    | <i>DUSP10</i>   |
| <i>DUSP14</i>   | <i>DUSP2</i>    | <i>DUSP4</i>   | <i>DUSP5</i>   | <i>DUSP6</i>     | <i>DUSP9</i>    | <i>DYRK2</i>    | <i>E2F1</i>     |
| <i>E2F3</i>     | <i>E4F1</i>     | <i>ECT2</i>    | <i>EEF2K</i>   | <i>EGF</i>       | <i>EGFL6</i>    | <i>EGFR</i>     | <i>EGLN1</i>    |
| <i>EIF2AK1</i>  | <i>EIF4E</i>    | <i>ELK1</i>    | <i>ELK3</i>    | <i>ELP2</i>      | <i>ENPP2</i>    | <i>EP300</i>    | <i>EP400</i>    |
| <i>EPHA1</i>    | <i>EPHA10</i>   | <i>EPHA2</i>   | <i>EPHA3</i>   | <i>EPHA4</i>     | <i>EPHA5</i>    | <i>EPHA6</i>    | <i>EPHA7</i>    |
| <i>EPHA8</i>    | <i>EPHB1</i>    | <i>EPHB2</i>   | <i>EPHB3</i>   | <i>EPHB4</i>     | <i>EPHB6</i>    | <i>EPO</i>      | <i>ERBB2</i>    |
| <i>ERBB3</i>    | <i>ERBB4</i>    | <i>ERC1</i>    | <i>ERCC2</i>   | <i>ERCC3</i>     | <i>ERCC4</i>    | <i>ERCC5</i>    | <i>ERCC6</i>    |
| <i>EREG</i>     | <i>ERG</i>      | <i>ERGIC3</i>  | <i>ERN1</i>    | <i>ERN2</i>      | <i>ERRF11</i>   | <i>ESR1</i>     | <i>ESR2</i>     |
| <i>ETS1</i>     | <i>ETS2</i>     | <i>ETV1</i>    | <i>ETV4</i>    | <i>ETV5</i>      | <i>ETV6</i>     | <i>EVC2</i>     | <i>EWSR1</i>    |
| <i>EXOC2</i>    | <i>EXOC4</i>    | <i>EXT1</i>    | <i>EXT2</i>    | <i>EZH2</i>      | <i>F2RL2</i>    | <i>FADD</i>     | <i>FAM123B</i>  |
| <i>FAM46A</i>   | <i>FANCA</i>    | <i>FANCB</i>   | <i>FANCC</i>   | <i>FANCD2</i>    | <i>FANCE</i>    | <i>FANCF</i>    | <i>FANCG</i>    |
| <i>FANCL</i>    | <i>FANCM</i>    | <i>FAS</i>     | <i>FASLG</i>   | <i>FASN</i>      | <i>FBXL6</i>    | <i>FBXO10</i>   | <i>FBXO32</i>   |
| <i>FBXW7</i>    | <i>FCGR3A</i>   | <i>FEN1</i>    | <i>FER</i>     | <i>FES</i>       | <i>FGF10</i>    | <i>FGF19</i>    | <i>FGF2</i>     |
| <i>FGF3</i>     | <i>FGF4</i>     | <i>FGFR1</i>   | <i>FGFR2</i>   | <i>FGFR3</i>     | <i>FGFR4</i>    | <i>FH</i>       | <i>FHIT</i>     |
| <i>FIGF</i>     | <i>FKTN</i>     | <i>FLI1</i>    | <i>FLNB</i>    | <i>FLT1</i>      | <i>FLT3</i>     | <i>FLT4</i>     | <i>FN1</i>      |
| <i>FOS</i>      | <i>FOSL1</i>    | <i>FOXL2</i>   | <i>FOXO1</i>   | <i>FOXO1</i>     | <i>FOXO3</i>    | <i>FOXP3</i>    | <i>FOXP4</i>    |
| <i>FPR3</i>     | <i>FRMD7</i>    | <i>FSCB</i>    | <i>FSCN1</i>   | <i>FURIN</i>     | <i>FUT4</i>     | <i>FYN</i>      | <i>FZD10</i>    |
| <i>G3BP2</i>    | <i>GAB1</i>     | <i>GAB2</i>    | <i>GAB3</i>    | <i>GABARAPL1</i> | <i>GABPA</i>    | <i>GADD45G</i>  | <i>GATA1</i>    |
| <i>GEN1</i>     | <i>GLI1</i>     | <i>GLI3</i>    | <i>GLPIR</i>   | <i>GARS</i>      | <i>GNAI1</i>    | <i>GNAQ</i>     | <i>GNAS</i>     |
| <i>GOLIM4</i>   | <i>GPC5</i>     | <i>GPR124</i>  | <i>GPR81</i>   | <i>GPR84</i>     | <i>GRB10</i>    | <i>GRB2</i>     | <i>GRIN2A</i>   |

|          |          |         |         |          |          |          |          |
|----------|----------|---------|---------|----------|----------|----------|----------|
| GRK5     | GRM1     | GRM3    | GRM5    | GRM6     | GRM7     | GRM8     | GSK3A    |
| GSK3B    | GSPT1    | GSTP1   | GSTT1   | GSX2     | GTPBP4   | GUCY1A2  | GUCY2F   |
| HAPLN1   | HCCS     | HCRTR2  | HDAC1   | HDAC2    | HDAC4    | HDAC9    | HDLBP    |
| HECW1    | HECW2    | HERC1   | HERC3   | HERC6    | HES1     | HES4     | HES5     |
| HES6     | HES7     | HEY1    | HEY2    | HEYL     | HGF      | HIF1A    | HIP1     |
| HIPK2    | HLA-A    | HMGA1   | HMGA2   | HNF1A    | HOXA3    | HOXA9    | HOXD13   |
| HRAS     | HRK      | HSD11B1 | HSD17B2 | HSF1     | HSP90AA1 | HSP90AB1 | HSPA2    |
| HUS1     | ICK      | ID1     | IDH1    | IDH2     | IGF1     | IGF1R    | IGF2     |
| IGF2R    | IGFBP1   | IGFBP2  | IGFBP3  | IGFBP4   | IGFBP5   | IGFBP6   | IGFBP7   |
| IGFBPL1  | IKBIP    | IKBKAP  | IKBKB   | IKBKE    | IKBKG    | IKZF1    | IKZF3    |
| IL12A    | IL12B    | IL1B    | IL21R   | ILF3     | ILK      | ING4     | INHBA    |
| INPP4A   | INPP4B   | INPP5A  | INPPL1  | INSR     | INSRR    | IQGAP1   | IRAK2    |
| IRAK3    | IRAK4    | IRF4    | IRS1    | IRS2     | IRS4     | ITCH     | ITGA10   |
| ITGA9    | ITGAL    | ITGAV   | ITGB2   | ITGB3    | ITGB4    | ITK      | ITPA     |
| ITPR1    | ITPR2    | ITPR3   | ITSN2   | JAG1     | JAG2     | JAK1     | JAK2     |
| JAK3     | JUN      | JUNB    | KAT2B   | KCNH8    | KDM1A    | KDM4C    | KDM5A    |
| KDM5C    | KDM6A    | KDR     | KEAP1   | KIAA0182 | KIAA1409 | KIF16B   | KISS1    |
| KIT      | KLF6     | KNTC1   | KRAS    | KSR1     | KSR2     | KTN1     | LAMC1    |
| LAMP1    | LARGE    | LATS1   | LATS2   | LCK      | LCP1     | LDHA     | LDHB     |
| LEF1     | LGALS7   | LGR5    | LHCGR   | LIG3     | LIG4     | LMO2     | LPHN1    |
| LPFN2    | LPFN3    | LRP1    | LRP1B   | LRP5     | LRP6     | LRRC10   | LRRC7    |
| LRRK2    | LRRN3    | LTA     | LTBP1   | LTBR     | LTF      | LTK      | LYN      |
| MACF1    | MAG      | MAG11   | MAG2    | MAG3     | MAMDC4   | MAN1B1   | MAP1LC3A |
| MAP1LC3B | MAP1LC3C | MAP2K1  | MAP2K2  | MAP2K4   | MAP2K6   | MAP2K7   | MAP3K1   |
| MAP3K11  | MAP3K14  | MAP3K2  | MAP3K5  | MAP3K6   | MAP3K8   | MAP3K9   | MAP4K4   |
| MAPK1    | MAPK10   | MAPK13  | MAPK3   | MAPK7    | MAPK8    | MAPK8IP2 | MAPK8IP3 |
| MAPK9    | MAPKAP1  | MAPT    | MARK1   | MARK4    | MAS1     | MAS1L    | MAST4    |
| MCHR2    | MCL1     | MCM3AP  | MCPH1   | MDC1     | MDK      | MDM2     | MDM4     |
| MECOM    | MEF2C    | MELK    | MEN1    | MERTK    | MET      | MEX3B    | MGA      |
| MGC42105 | MGMT     | MICAL1  | MINK1   | MITF     | MKNK1    | MKNK2    | MKRN3    |
| MLH1     | MLH3     | MLL     | MLL2    | MLL3     | MLL4     | MLL6     | MMP16    |
| MMP2     | MMP8     | MMP9    | MN1     | MOS      | MPL      | MRE11A   | MS4A1    |
| MSH2     | MSH3     | MSH4    | MSH6    | MSN      | MST1R    | MTHFR    | MTM1     |
| MTMR3    | MTOR     | MUC1    | MUC16   | MUC4     | MUTYH    | MYB      | MYBL1    |
| MYBL2    | MYC      | MYCL1   | MYCN    | MYD88    | MYEOV    | MYH1     | MYH11    |
| MYH9     | MYLK2    | MYO1B   | MYST4   | N4BP2    | NBN      | NCAM1    | NCDN     |
| NCK1     | NCK2     | NCOA2   | NCOA7   | NEDD4L   | NEIL3    | NEK10    | NEK11    |
| NEK2     | NEK7     | NEK8    | NEK9    | NF1      | NF2      | NFATC3   | NFKB1    |
| NFKB2    | NFKBIB   | NFKBID  | NFKBIE  | NFKBIZ   | NGFR     | NIN      | NIPBL    |
| NKD2     | NKX2-1   | NLE1    | NLK     | NLRP1    | NLRP3    | NLRP5    | NLRP8    |
| NMUR2    | NOS1     | NOS2    | NOTCH1  | NOTCH2   | NOTCH3   | NOTCH4   | NOV      |
| NPM1     | NPY2R    | NPY5R   | NQO1    | NROB1    | NRARP    | NRAS     | NRBP1    |
| NRG2     | NRK      | NRP2    | NTRK1   | NTRK2    | NTRK3    | NUAK1    | NUAK2    |
| NUMB     | NUMBL    | NUP153  | NUP214  | NUP98    | OBSN     | ODZ1     | OR8G1    |
| ORAI1    | ORAOV1   | ORM1    | P2RY10  | P2RY8    | PAG1     | PAK1     | PAK3     |
| PAK4     | PAK6     | PAK7    | PALB2   | PARK2    | PARP1    | PARP14   | PARP2    |
| PARP4    | PAX3     | PAX5    | PAX6    | PAX7     | PAXIP1   | PCDHB2   | PCGF2    |
| PCM1     | PCNA     | PDCD4   | PDGFA   | PDGFB    | PDGFRA   | PDGFRB   | PDGFRL   |
| PDI4A    | PDK1     | PDK3    | PDPK1   | PDZRN4   | PEA15    | PER1     | PERP     |
| PES1     | PFKFB1   | PFKFB2  | PFKFB3  | PFKFB4   | PGR      | PHB      | PHF14    |
| PHF20    | PHLPP1   | PHLPP2  | PHOX2B  | PIAS1    | PIK3C2A  | PIK3C2B  | PIK3C2G  |
| PIK3C3   | PIK3CA   | PIK3CB  | PIK3CD  | PIK3CG   | PIK3R1   | PIK3R2   | PIK3R3   |
| PIM1     | PIM2     | PKHD1   | PKM2    | PKMYT1   | PKN3     | PLA2G4A  | PLAG1    |
| PLAGL1   | PLAT     | PLAU    | PLCB1   | PLCB4    | PLCG1    | PLCG2    | PLCH1    |
| PLD1     | PLD2     | PLXNB3  | PMAIP1  | PML      | PMS2     | POLE     | POLL     |
| POLM     | POLN     | POLQ    | POU1F1  | PPARA    | PPARG    | PPARGC1A | PPM1D    |
| PPM1H    | PPM1L    | PPP1CC  | PPP1R3A | PPP2R1A  | PPP2R2B  | PPP2R3A  | PRDM16   |
| PRDM5    | PREX1    | PREX2   | PRKAA1  | PRKAA2   | PRKAB1   | PRKAB2   | PRKACA   |
| PRKACB   | PRKAGC   | PRKAG1  | PRKAG2  | PRKAG3   | PRKARIA  | PRKCA    | PRKCD    |
| PRKCE    | PRKCG    | PRKCH   | PRKCI   | PRKCZ    | PRKD1    | PRKD2    | PRKDC    |
| PRRC2C   | PSEN1    | PSEN2   | PTCH1   | PTCH2    | PTEN     | PTGFR    | PTGS2    |
| PTK2     | PTK2B    | PTP4A3  | PTPN1   | PTPN11   | PTPN12   | PTPN13   | PTPN14   |
| PTPN21   | PTPN22   | PTPN3   | PTPN5   | PTPN9    | PTPN9    | PTPRC    | PTPRD    |
| PTPRF    | PTPRG    | PTPRJ   | PTPRS   | PTPRT    | PTPRU    | PXN      | PYG02    |
| RAC1     | RAD18    | RAD21   | RAD50   | RAD51    | RAD51C   | RAD54B   | RAF1     |
| RALA     | RALB     | RALGAP1 | RAP1A   | RAP1GDS1 | RAPGEF2  | RAPH1    | RARA     |
| RASA1    | RASA2    | RASA3   | RASGRF1 | RASGRF2  | RASGRP1  | RASSF1   | RB1      |
| RB1CC1   | RBBP4    | RBL1    | RBL2    | RBP2     | RBPJ     | RECQL4   | REG4     |
| REL      | RELA     | RELB    | RET     | REV1     | REV3L    | RFC1     | RFC4     |
| RFC5     | RFX2     | RGL1    | RGL2    | RHEB     | RHOBTB2  | RICTOR   | RIF1     |

|                  |                  |                |                |                |                |                  |                  |
|------------------|------------------|----------------|----------------|----------------|----------------|------------------|------------------|
| <i>RING1</i>     | <i>RIPK1</i>     | <i>RIPK4</i>   | <i>RNF123</i>  | <i>RNF213</i>  | <i>ROBO1</i>   | <i>ROBO2</i>     | <i>ROCK1</i>     |
| <i>ROCK2</i>     | <i>ROR1</i>      | <i>ROR2</i>    | <i>ROSI</i>    | <i>RPL10</i>   | <i>RPL36A</i>  | <i>RPS6</i>      | <i>RPS6KA1</i>   |
| <i>RPS6KA2</i>   | <i>RPS6KA3</i>   | <i>RPS6KA4</i> | <i>RPS6KA5</i> | <i>RPS6KA6</i> | <i>RPS6KB1</i> | <i>RPS6KB2</i>   | <i>RPTOR</i>     |
| <i>RRAS2</i>     | <i>RRM2B</i>     | <i>RUNX1</i>   | <i>RUNX1T1</i> | <i>RYK</i>     | <i>SDHB</i>    | <i>SDHC</i>      | <i>SDHD</i>      |
| <i>SENP6</i>     | <i>SERPINB5</i>  | <i>SESN2</i>   | <i>SETD2</i>   | <i>SFN</i>     | <i>SFRP1</i>   | <i>SFRP2</i>     | <i>SGK1</i>      |
| <i>SGK2</i>      | <i>SGK3</i>      | <i>SGK494</i>  | <i>SH3GLB1</i> | <i>SHC1</i>    | <i>SIK1</i>    | <i>SIRT1</i>     | <i>SIRT6</i>     |
| <i>SIX4</i>      | <i>SKP2</i>      | <i>SLC17A5</i> | <i>SLC19A1</i> | <i>SLC22A2</i> | <i>SLC2A1</i>  | <i>SLC2A3</i>    | <i>SLC2A4</i>    |
| <i>SLC4A4</i>    | <i>SLC6A18</i>   | <i>SLC6A2</i>  | <i>SLCO1B3</i> | <i>SMAD2</i>   | <i>SMAD3</i>   | <i>SMAD4</i>     | <i>SMAD7</i>     |
| <i>SMARCA4</i>   | <i>SMARCB1</i>   | <i>SMC6</i>    | <i>SMG1</i>    | <i>SMO</i>     | <i>SMYD2</i>   | <i>SNAI1</i>     | <i>SNAI2</i>     |
| <i>SNAI3</i>     | <i>SNX13</i>     | <i>SOCS1</i>   | <i>SOD2</i>    | <i>SORL1</i>   | <i>SOS1</i>    | <i>SOS2</i>      | <i>SOX10</i>     |
| <i>SOX11</i>     | <i>SOX2</i>      | <i>SPEG</i>    | <i>SPEN</i>    | <i>SPO11</i>   | <i>SPOP</i>    | <i>SPRED1</i>    | <i>SPRY1</i>     |
| <i>SPRY2</i>     | <i>SPTAN1</i>    | <i>SRF</i>     | <i>SRF</i>     | <i>SRPK2</i>   | <i>SRSF6</i>   | <i>STAT1</i>     | <i>STAT3</i>     |
| <i>STAT4</i>     | <i>STAT5A</i>    | <i>STAT5B</i>  | <i>STIL</i>    | <i>STIM1</i>   | <i>STK11</i>   | <i>STK19</i>     | <i>STK32B</i>    |
| <i>STK32C</i>    | <i>STK33</i>     | <i>STK36</i>   | <i>STMN1</i>   | <i>STMN3</i>   | <i>STON2</i>   | <i>STYK1</i>     | <i>SUFU</i>      |
| <i>SULT1A1</i>   | <i>SUZ12</i>     | <i>SYK</i>     | <i>SYNE1</i>   | <i>SYNE2</i>   | <i>TAB3</i>    | <i>TACR3</i>     | <i>TAF15</i>     |
| <i>TAF1L</i>     | <i>TAL1</i>      | <i>TANK</i>    | <i>TBCK</i>    | <i>TBK1</i>    | <i>TBKBP1</i>  | <i>TBX22</i>     | <i>TCF12</i>     |
| <i>TCF3</i>      | <i>TCF4</i>      | <i>TCF7L2</i>  | <i>TDG</i>     | <i>TEC</i>     | <i>TECTA</i>   | <i>TEK</i>       | <i>TERT</i>      |
| <i>TET2</i>      | <i>TEX14</i>     | <i>TFDP1</i>   | <i>TFE3</i>    | <i>TFEB</i>    | <i>TGFB1</i>   | <i>TGFB2</i>     | <i>TGFB3</i>     |
| <i>TGFBR1</i>    | <i>TGFBR2</i>    | <i>THBS1</i>   | <i>THEM4</i>   | <i>THRAP3</i>  | <i>TIAM1</i>   | <i>TICAM1</i>    | <i>TICAM2</i>    |
| <i>TK1</i>       | <i>TLE4</i>      | <i>TLN1</i>    | <i>TLR2</i>    | <i>TLR3</i>    | <i>TLR4</i>    | <i>TLR7</i>      | <i>TMEFF2</i>    |
| <i>TMEM132B</i>  | <i>TMEM161A</i>  | <i>TMPRSS2</i> | <i>TMPRSS6</i> | <i>TNF</i>     | <i>TNFAIP3</i> | <i>TNFRSF10A</i> | <i>TNFRSF10B</i> |
| <i>TNFRSF11A</i> | <i>TNFRSF1A</i>  | <i>TNFRSF8</i> | <i>TNFSF11</i> | <i>TNK2</i>    | <i>TNKS</i>    | <i>TNKS2</i>     | <i>TNNI3K</i>    |
| <i>TNPO1</i>     | <i>TNPO3</i>     | <i>TOP1</i>    | <i>TOP2A</i>   | <i>TOP2B</i>   | <i>TOPBP1</i>  | <i>TP53</i>      | <i>TP53AIP1</i>  |
| <i>TP53BP1</i>   | <i>TP63</i>      | <i>TP73</i>    | <i>TPD52</i>   | <i>TPMT</i>    | <i>TPO</i>     | <i>TRADD</i>     | <i>TRAF1</i>     |
| <i>TRAF2</i>     | <i>TRAF3</i>     | <i>TRAF4</i>   | <i>TRAF5</i>   | <i>TRAF6</i>   | <i>TRAF7</i>   | <i>TRIB3</i>     | <i>TRIM24</i>    |
| <i>TRIM28</i>    | <i>TRIM33</i>    | <i>TRIM36</i>  | <i>TRIM37</i>  | <i>TRIM47</i>  | <i>TRIO</i>    | <i>TRIP11</i>    | <i>TRRAP</i>     |
| <i>TSC1</i>      | <i>TSC2</i>      | <i>TSHR</i>    | <i>TSPAN31</i> | <i>TTBK2</i>   | <i>TTK</i>     | <i>TTN</i>       | <i>TUBD1</i>     |
| <i>TWF2</i>      | <i>TWIST1</i>    | <i>TYK2</i>    | <i>UBA1</i>    | <i>UBASH3B</i> | <i>UBP1</i>    | <i>UBR4</i>      | <i>UBR5</i>      |
| <i>UGT1A1</i>    | <i>UHRF1BP1L</i> | <i>ULK1</i>    | <i>ULK2</i>    | <i>ULK3</i>    | <i>UMPS</i>    | <i>UPP1</i>      | <i>USP24</i>     |
| <i>USP28</i>     | <i>USP33</i>     | <i>USP34</i>   | <i>USP42</i>   | <i>USP43</i>   | <i>USP5</i>    | <i>USP54</i>     | <i>USP6NL</i>    |
| <i>USP7</i>      | <i>USP8</i>      | <i>USP9X</i>   | <i>UVRAG</i>   | <i>VAV1</i>    | <i>VEGFA</i>   | <i>VEGFC</i>     | <i>VEPH1</i>     |
| <i>VHL</i>       | <i>VPS13B</i>    | <i>VRTN</i>    | <i>WEE1</i>    | <i>WHSC1</i>   | <i>WIF1</i>    | <i>WNK1</i>      | <i>WNK2</i>      |
| <i>WNK4</i>      | <i>WNT1</i>      | <i>WNT10B</i>  | <i>WNT2</i>    | <i>WNT2B</i>   | <i>WNT4</i>    | <i>WNT9B</i>     | <i>WRN</i>       |
| <i>WSB1</i>      | <i>WT1</i>       | <i>WWP2</i>    | <i>XBP1</i>    | <i>XIAP</i>    | <i>XPA</i>     | <i>XPC</i>       | <i>XRCC1</i>     |
| <i>XRCC2</i>     | <i>XRCC3</i>     | <i>XRCC5</i>   | <i>XRCC6</i>   | <i>YWHAQ</i>   | <i>ZAP70</i>   | <i>ZBTB16</i>    | <i>ZC3H12B</i>   |
| <i>ZEB1</i>      | <i>ZEB2</i>      | <i>ZMYM2</i>   | <i>ZMYM4</i>   | <i>ZNF148</i>  | <i>ZNF217</i>  | <i>ZNF384</i>    | <i>ZNF442</i>    |
| <i>ZNF831</i>    |                  |                |                |                |                |                  |                  |

**Supplementary Table 2. Comparison of Moffitt and TCGA Non-Silent Mutation Rates**

| Gene            | Moffitt<br>Pts (%) | TCGA<br>Pts (%) | Pct<br>Diff | Fisher<br>p-value       |
|-----------------|--------------------|-----------------|-------------|-------------------------|
| <i>KRAS</i>     | 190 (41)           | 90 (42)         | -1          | .67                     |
| <i>TP53</i>     | 277 (59)           | 111 (52)        | 7           | .11                     |
| <i>HLA-A*</i>   | 84 (18)            | 4 (2)           | 16          | 1.4x10 <sup>-10</sup>   |
| <i>APC</i>      | 329 (70)           | 162 (76)        | -6          | .12                     |
| <i>SMAD4</i>    | 55 (12)            | 29 (14)         | -2          | .53                     |
| <i>FBXW7</i>    | 57 (12)            | 35 (17)         | -5          | .11                     |
| <i>MUC4*</i>    | 242 (52)           | 5 (2)           | 50          | 1.1x10 <sup>-43</sup>   |
| <i>BRAF</i>     | 60 (13)            | 22 (10)         | -3          | .45                     |
| <i>TCF7L2</i>   | 45 (10)            | 30 (14)         | -4          | .087                    |
| <i>PIK3CA</i>   | 71 (15)            | 43 (20)         | -5          | .12                     |
| <i>GNAS</i>     | 45 (10)            | 23 (11)         | -1          | .68                     |
| <i>TAF1L</i>    | 56 (12)            | 18 (8)          | 4           | .19                     |
| <i>CSMD3</i>    | 84 (18)            | 31 (15)         | 3           | .32                     |
| <i>LRP1B</i>    | 95 (20)            | 37 (17)         | 3           | .40                     |
| <i>OBSCN*</i>   | 148 (32)           | 15 (7)          | 25          | 1.1x10 <sup>-13</sup>   |
| <i>SYNE1*</i>   | 157 (34)           | 45 (21)         | 13          | .0011                   |
| <i>TTN*</i>     | 321 (69)           | 78 (37)         | 32          | 9.5 x 10 <sup>-15</sup> |
| <i>CBX4*</i>    | 28 (6)             | 1 (0.5)         | 6           | .0003                   |
| <i>ITGB4*</i>   | 45 (10)            | 4 (2)           | 8           | .0002                   |
| <i>ADAMTS18</i> | 43 (9)             | 12 (6)          | 3           | .13                     |
| <i>FAM123B</i>  | 46 (10)            | 24 (11)         | -1          | .59                     |
| <i>MUC16*</i>   | 187 (40)           | 35 (17)         | 23          | 4.8 x 10 <sup>-10</sup> |

Note: TCGA data based on 212 samples<sup>2</sup>.

\* Genes that have substantially lower frequencies ( $p < 0.01$  in TCGA)

**Supplementary Table 3. Demographic features of 10 groups of CRC**

| Frequencies and percentages of right tumor, stages, MSI, metastasis, and “developing” metastasis in 10 groups |      |        |             |             |                  |                  |         |    |             |    |
|---------------------------------------------------------------------------------------------------------------|------|--------|-------------|-------------|------------------|------------------|---------|----|-------------|----|
| Group Name                                                                                                    | N    | Md Age | % Right     | No. MSI (%) | Mets (%)         | 1-2              | Stage % |    | Devel. Mets |    |
|                                                                                                               |      |        |             |             |                  |                  | 3       | 4  |             |    |
| 1a                                                                                                            | None | 35     | 65          | 43          | 6 (17)           | 10 (29)          | 51      | 26 | 23          | 6  |
| 1b                                                                                                            | B    | 25     | <b>77</b> ↑ | <b>84</b> ↑ | <b>21 (84)</b> ↑ | <b>3 (12)</b> ↓  | 64      | 24 | 12          | 0  |
| 2                                                                                                             | K    | 18     | 67          | 50          | 4 (22)           | 9 (50)           | 39      | 22 | 39          | 11 |
| 3a                                                                                                            | P    | 40     | 69          | 41          | 2 (5)            | 9 (22)           | 47      | 42 | <b>11</b> ↓ | 12 |
| 3b                                                                                                            | BP   | 20     | <b>75</b> ↑ | 60          | <b>10 (50)</b> ↑ | 6 (30)           | 55      | 15 | 30          | 0  |
| 4*                                                                                                            | A    | 43     | 68          | 37          | 8 (19)           | 10 (23)          | 56      | 30 | 14          | 9  |
| 5                                                                                                             | KP   | 18     | 70          | 50          | 2 (11)           | 8 (44)           | 33      | 39 | 28          | 17 |
| 6                                                                                                             | AK   | 70     | 66          | 44          | 6 (9)            | 25 (36)          | 51      | 23 | 26          | 10 |
| 7*                                                                                                            | AP   | 113    | <b>60</b> ↓ | <b>21</b> ↓ | <b>1 (1)</b> ↓   | 41 (36)          | 39      | 36 | 25          | 12 |
| 8                                                                                                             | AKP  | 86     | 65          | 45          | <b>1 (1)</b> ↓   | <b>44 (51)</b> ↑ | 24      | 47 | 29          | 22 |
| Total                                                                                                         |      | 468    | 66          | 41          | 61 (13)          | 165 (35)         | 43      | 33 | 24          | 11 |

| Percentages of each of 10 groups and MSI by Primary Location |     |                    |             |      |    |    |    |             |             |             |
|--------------------------------------------------------------|-----|--------------------|-------------|------|----|----|----|-------------|-------------|-------------|
| Location                                                     | N   | Group <sup>^</sup> |             |      |    |    |    |             |             |             |
|                                                              |     | B/BP               | None        | K/KP | P  | A  | AK | AP          | AKP         | MSI         |
| Cecum                                                        | 65  | 8                  | 3           | 9    | 8  | 11 | 22 | <b>12</b> ↓ | <b>28</b> ↑ | 15          |
| Ascend Rt                                                    | 100 | <b>25</b> ↑        | 8           | 10   | 9  | 8  | 10 | <b>11</b> ↓ | 19          | <b>31</b> ↑ |
| Transverse                                                   | 26  | 12                 | <b>19</b> ↑ | 8    | 8  | 4  | 27 | 19          | 4           | <b>31</b> ↑ |
| Descend Lt                                                   | 32  | 3                  | 3           | 9    | 9  | 6  | 22 | 28          | 19          | 9           |
| Sigmoid                                                      | 131 | 6                  | 6           | 6    | 10 | 9  | 11 | <b>34</b> ↑ | 18          | <b>4</b> ↓  |
| Rectosig                                                     | 40  | 2                  | 2           | 2    | 12 | 8  | 18 | <b>42</b> ↑ | 12          | <b>2</b> ↓  |
| Rectum                                                       | 70  | <b>3</b> ↓         | <b>14</b> ↑ | 9    | 3  | 14 | 16 | 24          | 17          | <b>6</b> ↓  |
| Overall                                                      | 464 | 10                 | 8           | 8    | 8  | 9  | 15 | 24          | 17          | 13          |

Notes:

A = APC, K = KRAS, P = TP53, B = BRAF. None = none of the 4 genes are mutated.

\* Groups 4 and 7 include 3 and 5 patients with BRAF(V600E) mutations, respectively.

<sup>^</sup> Groups B and BP, and K and KP were combined together, as their location distributions were similar, and their counts were rather low when separated.

AKP muts represents the number of partnering mutations (A, K or P).

There is significantly higher or lower observation than expectation: ↑(↓) for  $p < 0.05$ ; ↑↑(↓↓) for  $p < 0.01$ ; ↑↑↑(↓↓↓) for  $p < 0.001$ ; based on individual chi-square ( $X^2$ ) contribution from the table cell;

Devel. Mets = Percent of non-stage 4 patients in class who had distant metastasis at tissue collection.

Overall, the median age was 66, 41% had right-sided tumors, 13% were MSI and 35% had distant metastases. The BRAF groups (B, BP) (10%) were older, had more right-sided tumors, and higher MSI rates. Only 8 tumors had BRAF and APC mutations (5 also had TP53 mutations) and were thus placed into groups 4 and 7; three and one of them were MSI-H, respectively. Group 7 (AP) tumors (24%) were younger, had higher left-sided and MSS rates, while Group 8 (AKP) tumors (18%) were more often MSS and distantly metastatic.



**Supplementary Table 4. Association between *KRAS* and *TP53* by *APC* mutation status**

**A. *APC*mut tumors (N=312)**

|                 |          | <i>TP53</i> wt | <i>TP53</i> mut | Total |
|-----------------|----------|----------------|-----------------|-------|
| <i>KRAS</i> mut | Group    | AK             | AKP             |       |
|                 | Observed | 70             | 85              | 155   |
|                 | Expected | 56.1           | 98.9            |       |
| <i>KRAS</i> wt  | Group    | A              | AP              |       |
|                 | Observed | 43             | 114             | 157   |
|                 | Expected | 56.9           | 100.1           |       |
| Total           |          | 113            | 199             | 312   |

Pearson  $r = -0.18$ ; Fisher  $p$ -value = 0.0005

**B. *APC*wt tumors (N=156)**

|                 |          | <i>TP53</i> wt | <i>TP53</i> mut | Total |
|-----------------|----------|----------------|-----------------|-------|
| <i>KRAS</i> mut | Group    | K              | KP              |       |
|                 | Observed | 17             | 18              | 35    |
|                 | Expected | 17.5           | 17.5            |       |
| <i>KRAS</i> wt  | Group    | B, Unk         | P, BP           |       |
|                 | Observed | 61             | 60              | 121   |
|                 | Expected | 60.5           | 60.5            |       |
| Total           |          | 78             | 78              | 156   |

Pearson  $r = -0.02$ ; Fisher  $p$ -value = 0.71

Notes: A = *APC*, K = *KRAS*, P = *TP53*, B = *BRAF*, Unk = tumors with unknown drivers

AKP = mutations in *APC*, *KRAS*, and *TP53*;

The negative association between *KRAS* and *TP53*, however, appears to be induced by the mathematics of the 2x2 table, which requires that the under-representation of *APC*-only tumors be matched in the AKP group.

**Supplementary Table 5. APC truncation mutation profiles and related other gene mutations**

| barcode  | zone1-2 | Zone3-4 | Biallelic_loss | msi_high | WNT_pathway | CTNN | WNT | FAM123B | MACF1 | TCF7L2 | AXIN1 | CDH1 | GSK3B | WIF1 | TCF4 |
|----------|---------|---------|----------------|----------|-------------|------|-----|---------|-------|--------|-------|------|-------|------|------|
| DS-40207 | 0       | 0       | 0              | 0        | 0           | 0    | 0   | 0       | 0     | 0      | 0     | 0    | 0     | 0    | 0    |
| DS-48717 | 0       | 0       | 0              | 0        | 0           | 0    | 0   | 0       | 0     | 0      | 0     | 0    | 0     | 0    | 0    |
| DS-48788 | 0       | 0       | 0              | 0        | 0           | 0    | 0   | 0       | 0     | 0      | 0     | 0    | 0     | 0    | 0    |
| DS-48888 | 0       | 0       | 0              | 0        | 0           | 0    | 0   | 0       | 0     | 0      | 0     | 0    | 0     | 0    | 0    |
| DS-49422 | 0       | 0       | 0              | 0        | 0           | 0    | 0   | 0       | 0     | 0      | 0     | 0    | 0     | 0    | 0    |
| DS-49449 | 0       | 0       | 0              | 0        | 0           | 0    | 0   | 0       | 0     | 0      | 0     | 0    | 0     | 0    | 0    |
| DS-49454 | 0       | 0       | 0              | 0        | 0           | 0    | 0   | 0       | 0     | 0      | 0     | 0    | 0     | 0    | 0    |
| DS-49513 | 0       | 0       | 0              | 0        | 0           | 0    | 0   | 0       | 0     | 0      | 0     | 0    | 0     | 0    | 0    |
| DS-49664 | 0       | 0       | 0              | 0        | 0           | 0    | 0   | 0       | 0     | 0      | 0     | 0    | 0     | 0    | 0    |
| DS-49843 | 0       | 0       | 0              | 0        | 0           | 0    | 0   | 0       | 0     | 0      | 0     | 0    | 0     | 0    | 0    |
| DS-49844 | 0       | 0       | 0              | 0        | 0           | 0    | 0   | 0       | 0     | 0      | 0     | 0    | 0     | 0    | 0    |
| DS-50544 | 0       | 0       | 0              | 0        | 0           | 0    | 0   | 0       | 0     | 0      | 0     | 0    | 0     | 0    | 0    |
| DS-50587 | 0       | 0       | 0              | 0        | 0           | 0    | 0   | 0       | 0     | 0      | 0     | 0    | 0     | 0    | 0    |
| DS-50607 | 0       | 0       | 0              | 0        | 0           | 0    | 0   | 0       | 0     | 0      | 0     | 0    | 0     | 0    | 0    |
| DS-50712 | 0       | 0       | 0              | 0        | 0           | 0    | 0   | 0       | 0     | 0      | 0     | 0    | 0     | 0    | 0    |
| DS-50740 | 0       | 0       | 0              | 0        | 0           | 0    | 0   | 0       | 0     | 0      | 0     | 0    | 0     | 0    | 0    |
| DS-51020 | 0       | 0       | 0              | 0        | 0           | 0    | 0   | 0       | 0     | 0      | 0     | 0    | 0     | 0    | 0    |
| DS-51043 | 0       | 0       | 0              | 0        | 0           | 0    | 0   | 0       | 0     | 0      | 0     | 0    | 0     | 0    | 0    |
| DS-51610 | 0       | 0       | 0              | 0        | 0           | 0    | 0   | 0       | 0     | 0      | 0     | 0    | 0     | 0    | 0    |
| DS-51652 | 0       | 0       | 0              | 0        | 0           | 0    | 0   | 0       | 0     | 0      | 0     | 0    | 0     | 0    | 0    |
| DS-51809 | 0       | 0       | 0              | 0        | 0           | 0    | 0   | 0       | 0     | 0      | 0     | 0    | 0     | 0    | 0    |
| DS-51948 | 0       | 0       | 0              | 0        | 0           | 0    | 0   | 0       | 0     | 0      | 0     | 0    | 0     | 0    | 0    |
| DS-51995 | 0       | 0       | 0              | 0        | 0           | 0    | 0   | 0       | 0     | 0      | 0     | 0    | 0     | 0    | 0    |
| DS-53059 | 0       | 0       | 0              | 0        | 0           | 0    | 0   | 0       | 0     | 0      | 0     | 0    | 0     | 0    | 0    |
| DS-53114 | 0       | 0       | 0              | 0        | 0           | 0    | 0   | 0       | 0     | 0      | 0     | 0    | 0     | 0    | 0    |
| DS-53116 | 0       | 0       | 0              | 0        | 0           | 0    | 0   | 0       | 0     | 0      | 0     | 0    | 0     | 0    | 0    |
| DS-53211 | 0       | 0       | 0              | 0        | 0           | 0    | 0   | 0       | 0     | 0      | 0     | 0    | 0     | 0    | 0    |
| DS-53230 | 0       | 0       | 0              | 0        | 0           | 0    | 0   | 0       | 0     | 0      | 0     | 0    | 0     | 0    | 0    |
| DS-53303 | 0       | 0       | 0              | 0        | 0           | 0    | 0   | 0       | 0     | 0      | 0     | 0    | 0     | 0    | 0    |
| DS-53317 | 0       | 0       | 0              | 0        | 0           | 0    | 0   | 0       | 0     | 0      | 0     | 0    | 0     | 0    | 0    |
| DS-53324 | 0       | 0       | 0              | 0        | 0           | 0    | 0   | 0       | 0     | 0      | 0     | 0    | 0     | 0    | 0    |
| DS-53359 | 0       | 0       | 0              | 0        | 0           | 0    | 0   | 0       | 0     | 0      | 0     | 0    | 0     | 0    | 0    |
| DS-53460 | 0       | 0       | 0              | 0        | 0           | 0    | 0   | 0       | 0     | 0      | 0     | 0    | 0     | 0    | 0    |
| DS-53489 | 0       | 0       | 0              | 0        | 0           | 0    | 0   | 0       | 0     | 0      | 0     | 0    | 0     | 0    | 0    |
| DS-53528 | 0       | 0       | 0              | 0        | 0           | 0    | 0   | 0       | 0     | 0      | 0     | 0    | 0     | 0    | 0    |
| DS-53679 | 0       | 0       | 0              | 0        | 0           | 0    | 0   | 0       | 0     | 0      | 0     | 0    | 0     | 0    | 0    |

|          |   |   |   |   |   |   |   |   |   |   |   |   |   |   |
|----------|---|---|---|---|---|---|---|---|---|---|---|---|---|---|
| DS-53750 | 0 | 0 | 0 | 0 | 0 | 0 | 0 | 0 | 0 | 0 | 0 | 0 | 0 | 0 |
| DS-53783 | 0 | 0 | 0 | 0 | 0 | 0 | 0 | 0 | 0 | 0 | 0 | 0 | 0 | 0 |
| DS-53800 | 0 | 0 | 0 | 0 | 0 | 0 | 0 | 0 | 0 | 0 | 0 | 0 | 0 | 0 |
| DS-53957 | 0 | 0 | 0 | 0 | 0 | 0 | 0 | 0 | 0 | 0 | 0 | 0 | 0 | 0 |
| DS-54043 | 0 | 0 | 0 | 0 | 0 | 0 | 0 | 0 | 0 | 0 | 0 | 0 | 0 | 0 |
| DS-54051 | 0 | 0 | 0 | 0 | 0 | 0 | 0 | 0 | 0 | 0 | 0 | 0 | 0 | 0 |
| DS-54054 | 0 | 0 | 0 | 0 | 0 | 0 | 0 | 0 | 0 | 0 | 0 | 0 | 0 | 0 |
| DS-54730 | 0 | 0 | 0 | 0 | 0 | 0 | 0 | 0 | 0 | 0 | 0 | 0 | 0 | 0 |
| DS-54783 | 0 | 0 | 0 | 0 | 0 | 0 | 0 | 0 | 0 | 0 | 0 | 0 | 0 | 0 |
| DS-54833 | 0 | 0 | 0 | 0 | 0 | 0 | 0 | 0 | 0 | 0 | 0 | 0 | 0 | 0 |
| DS-55343 | 0 | 0 | 0 | 0 | 0 | 0 | 0 | 0 | 0 | 0 | 0 | 0 | 0 | 0 |
| DS-55398 | 0 | 0 | 0 | 0 | 0 | 0 | 0 | 0 | 0 | 0 | 0 | 0 | 0 | 0 |
| DS-56069 | 0 | 0 | 0 | 0 | 0 | 0 | 0 | 0 | 0 | 0 | 0 | 0 | 0 | 0 |
| DS-56330 | 0 | 0 | 0 | 0 | 0 | 0 | 0 | 0 | 0 | 0 | 0 | 0 | 0 | 0 |
| DS-56334 | 0 | 0 | 0 | 0 | 0 | 0 | 0 | 0 | 0 | 0 | 0 | 0 | 0 | 0 |
| DS-56551 | 0 | 0 | 0 | 0 | 0 | 0 | 0 | 0 | 0 | 0 | 0 | 0 | 0 | 0 |
| DS-56604 | 0 | 0 | 0 | 0 | 0 | 0 | 0 | 0 | 0 | 0 | 0 | 0 | 0 | 0 |
| DS-57046 | 0 | 0 | 0 | 0 | 0 | 0 | 0 | 0 | 0 | 0 | 0 | 0 | 0 | 0 |
| DS-57048 | 0 | 0 | 0 | 0 | 0 | 0 | 0 | 0 | 0 | 0 | 0 | 0 | 0 | 0 |
| DS-57055 | 0 | 0 | 0 | 0 | 0 | 0 | 0 | 0 | 0 | 0 | 0 | 0 | 0 | 0 |
| DS-57433 | 0 | 0 | 0 | 0 | 0 | 0 | 0 | 0 | 0 | 0 | 0 | 0 | 0 | 0 |
| DS-57616 | 0 | 0 | 0 | 0 | 0 | 0 | 0 | 0 | 0 | 0 | 0 | 0 | 0 | 0 |
| DS-58510 | 0 | 0 | 0 | 0 | 0 | 0 | 0 | 0 | 0 | 0 | 0 | 0 | 0 | 0 |
| DS-58532 | 0 | 0 | 0 | 0 | 0 | 0 | 0 | 0 | 0 | 0 | 0 | 0 | 0 | 0 |
| DS-59213 | 0 | 0 | 0 | 0 | 0 | 0 | 0 | 0 | 0 | 0 | 0 | 0 | 0 | 0 |
| DS-67098 | 0 | 0 | 0 | 0 | 0 | 0 | 0 | 0 | 0 | 0 | 0 | 0 | 0 | 0 |
| DS-67931 | 0 | 0 | 0 | 0 | 0 | 0 | 0 | 0 | 0 | 0 | 0 | 0 | 0 | 0 |
| DS-52005 | 0 | 0 | 0 | 0 | 1 | 0 | 0 | 0 | 0 | 0 | 1 | 0 | 0 | 0 |
| DS-52925 | 0 | 0 | 0 | 0 | 1 | 0 | 0 | 0 | 0 | 0 | 1 | 0 | 0 | 0 |
| DS-53117 | 0 | 0 | 0 | 0 | 1 | 0 | 0 | 0 | 0 | 0 | 1 | 0 | 0 | 0 |
| DS-54038 | 0 | 0 | 0 | 0 | 1 | 0 | 0 | 0 | 0 | 0 | 1 | 0 | 0 | 0 |
| DS-54189 | 0 | 0 | 0 | 0 | 1 | 0 | 0 | 0 | 0 | 0 | 1 | 0 | 0 | 0 |
| DS-48894 | 0 | 0 | 0 | 0 | 1 | 0 | 0 | 0 | 0 | 1 | 0 | 0 | 0 | 0 |
| DS-51972 | 0 | 0 | 0 | 0 | 1 | 0 | 0 | 0 | 0 | 1 | 0 | 0 | 0 | 0 |
| DS-52367 | 0 | 0 | 0 | 0 | 1 | 0 | 0 | 0 | 0 | 0 | 0 | 1 | 0 | 0 |
| DS-50597 | 0 | 0 | 0 | 0 | 1 | 0 | 0 | 1 | 0 | 0 | 0 | 0 | 0 | 0 |
| DS-50631 | 0 | 0 | 0 | 0 | 1 | 0 | 0 | 1 | 0 | 0 | 0 | 0 | 0 | 0 |
| DS-50925 | 0 | 0 | 0 | 0 | 1 | 0 | 0 | 1 | 0 | 0 | 0 | 0 | 0 | 0 |
| DS-51754 | 0 | 0 | 0 | 0 | 1 | 0 | 0 | 1 | 0 | 0 | 0 | 0 | 0 | 0 |
| DS-54223 | 0 | 0 | 0 | 0 | 1 | 0 | 0 | 1 | 0 | 0 | 0 | 0 | 0 | 0 |
| DS-54289 | 0 | 0 | 0 | 0 | 1 | 0 | 0 | 1 | 0 | 0 | 0 | 0 | 0 | 0 |
| DS-54405 | 0 | 0 | 0 | 0 | 1 | 0 | 0 | 1 | 0 | 0 | 0 | 0 | 0 | 0 |
| DS-54718 | 0 | 0 | 0 | 0 | 1 | 0 | 0 | 1 | 0 | 0 | 0 | 0 | 0 | 0 |

|          |   |   |   |   |   |   |   |   |   |   |   |   |   |   |   |
|----------|---|---|---|---|---|---|---|---|---|---|---|---|---|---|---|
| DS-54926 | 0 | 0 | 0 | 0 | 1 | 0 | 0 | 0 | 1 | 0 | 0 | 0 | 0 | 0 | 0 |
| DS-56142 | 0 | 0 | 0 | 0 | 1 | 0 | 0 | 0 | 1 | 0 | 0 | 0 | 0 | 0 | 0 |
| DS-56635 | 0 | 0 | 0 | 0 | 1 | 0 | 0 | 0 | 1 | 0 | 0 | 0 | 0 | 0 | 0 |
| DS-57052 | 0 | 0 | 0 | 0 | 1 | 0 | 0 | 0 | 1 | 0 | 0 | 0 | 0 | 0 | 0 |
| DS-59550 | 0 | 0 | 0 | 0 | 1 | 0 | 0 | 0 | 1 | 0 | 0 | 0 | 0 | 0 | 0 |
| DS-59556 | 0 | 0 | 0 | 0 | 1 | 0 | 0 | 0 | 1 | 0 | 0 | 0 | 0 | 0 | 0 |
| DS-59974 | 0 | 0 | 0 | 0 | 1 | 0 | 0 | 0 | 1 | 0 | 0 | 0 | 0 | 0 | 0 |
| DS-48937 | 0 | 0 | 0 | 0 | 1 | 0 | 0 | 0 | 0 | 1 | 0 | 0 | 0 | 0 | 0 |
| DS-58843 | 0 | 0 | 0 | 0 | 1 | 0 | 0 | 0 | 0 | 1 | 0 | 0 | 0 | 0 | 0 |
| DS-57472 | 0 | 0 | 0 | 0 | 1 | 0 | 0 | 0 | 0 | 1 | 0 | 1 | 0 | 0 | 0 |
| DS-48055 | 0 | 0 | 0 | 0 | 1 | 0 | 0 | 0 | 0 | 1 | 1 | 0 | 0 | 0 | 0 |
| DS-56979 | 0 | 0 | 0 | 0 | 1 | 0 | 0 | 0 | 1 | 1 | 0 | 0 | 0 | 0 | 1 |
| DS-48957 | 0 | 0 | 0 | 0 | 1 | 0 | 0 | 1 | 0 | 0 | 0 | 0 | 0 | 0 | 0 |
| DS-51877 | 0 | 0 | 0 | 0 | 1 | 0 | 0 | 1 | 0 | 0 | 0 | 0 | 0 | 0 | 0 |
| DS-53682 | 0 | 0 | 0 | 0 | 1 | 0 | 0 | 1 | 0 | 0 | 0 | 0 | 0 | 0 | 0 |
| DS-33635 | 0 | 0 | 0 | 0 | 1 | 0 | 0 | 1 | 1 | 0 | 0 | 0 | 0 | 0 | 0 |
| DS-67984 | 0 | 0 | 0 | 0 | 1 | 0 | 0 | 1 | 1 | 0 | 0 | 0 | 0 | 0 | 0 |
| DS-48893 | 0 | 0 | 0 | 0 | 1 | 0 | 1 | 0 | 0 | 0 | 0 | 0 | 0 | 0 | 0 |
| DS-52126 | 0 | 0 | 0 | 0 | 1 | 0 | 1 | 0 | 0 | 0 | 0 | 0 | 0 | 0 | 0 |
| DS-52847 | 0 | 0 | 0 | 0 | 1 | 0 | 1 | 0 | 0 | 0 | 0 | 0 | 0 | 0 | 0 |
| DS-53053 | 0 | 0 | 0 | 0 | 1 | 0 | 1 | 0 | 0 | 0 | 0 | 0 | 0 | 0 | 0 |
| DS-53168 | 0 | 0 | 0 | 0 | 1 | 0 | 1 | 0 | 0 | 0 | 0 | 0 | 0 | 0 | 0 |
| DS-54564 | 0 | 0 | 0 | 0 | 1 | 0 | 1 | 0 | 0 | 0 | 0 | 0 | 0 | 0 | 0 |
| DS-49315 | 0 | 0 | 0 | 0 | 1 | 0 | 1 | 0 | 1 | 0 | 0 | 0 | 0 | 0 | 0 |
| DS-50620 | 0 | 0 | 0 | 0 | 1 | 0 | 1 | 0 | 1 | 0 | 0 | 0 | 0 | 0 | 0 |
| DS-55411 | 0 | 0 | 0 | 0 | 1 | 0 | 1 | 0 | 1 | 0 | 0 | 0 | 0 | 0 | 0 |
| DS-49208 | 0 | 0 | 0 | 0 | 1 | 1 | 0 | 0 | 0 | 0 | 0 | 0 | 0 | 0 | 0 |
| DS-53516 | 0 | 0 | 0 | 0 | 1 | 1 | 0 | 0 | 0 | 0 | 0 | 0 | 0 | 0 | 0 |
| DS-54031 | 0 | 0 | 0 | 0 | 1 | 1 | 0 | 0 | 0 | 0 | 0 | 0 | 0 | 0 | 0 |
| DS-54362 | 0 | 0 | 0 | 0 | 1 | 1 | 0 | 0 | 0 | 0 | 0 | 0 | 0 | 0 | 0 |
| DS-56796 | 0 | 0 | 0 | 0 | 1 | 1 | 0 | 0 | 0 | 0 | 0 | 0 | 0 | 0 | 0 |
| DS-58478 | 0 | 0 | 0 | 0 | 1 | 1 | 0 | 0 | 0 | 0 | 0 | 0 | 0 | 0 | 0 |
| DS-48639 | 0 | 0 | 0 | 1 | 0 | 0 | 0 | 0 | 0 | 0 | 0 | 0 | 0 | 0 | 0 |
| DS-50754 | 0 | 0 | 0 | 1 | 0 | 0 | 0 | 0 | 0 | 0 | 0 | 0 | 0 | 0 | 0 |
| DS-53382 | 0 | 0 | 0 | 1 | 0 | 0 | 0 | 0 | 0 | 0 | 0 | 0 | 0 | 0 | 0 |
| DS-51155 | 0 | 0 | 0 | 1 | 1 | 0 | 0 | 0 | 0 | 0 | 0 | 1 | 0 | 0 | 0 |
| DS-51783 | 0 | 0 | 0 | 1 | 1 | 0 | 0 | 0 | 0 | 0 | 0 | 1 | 0 | 0 | 0 |
| DS-53730 | 0 | 0 | 0 | 1 | 1 | 0 | 0 | 0 | 0 | 0 | 0 | 0 | 0 | 1 | 0 |
| DS-51711 | 0 | 0 | 0 | 1 | 1 | 0 | 0 | 0 | 0 | 0 | 0 | 1 | 0 | 1 | 0 |
| DS-48913 | 0 | 0 | 0 | 1 | 1 | 0 | 0 | 0 | 1 | 0 | 0 | 0 | 0 | 0 | 0 |
| DS-51827 | 0 | 0 | 0 | 1 | 1 | 0 | 0 | 0 | 1 | 0 | 0 | 0 | 0 | 0 | 0 |
| DS-54750 | 0 | 0 | 0 | 1 | 1 | 0 | 0 | 0 | 1 | 0 | 0 | 0 | 0 | 0 | 0 |
| DS-56351 | 0 | 0 | 0 | 1 | 1 | 0 | 0 | 0 | 1 | 0 | 0 | 0 | 0 | 0 | 0 |

|          |   |   |   |   |   |   |   |   |   |   |   |   |   |   |   |
|----------|---|---|---|---|---|---|---|---|---|---|---|---|---|---|---|
| DS-56820 | 0 | 0 | 0 | 1 | 1 | 0 | 0 | 0 | 1 | 0 | 0 | 0 | 0 | 0 | 0 |
| DS-51215 | 0 | 0 | 0 | 1 | 1 | 0 | 0 | 0 | 1 | 0 | 0 | 1 | 0 | 0 | 0 |
| DS-51893 | 0 | 0 | 0 | 1 | 1 | 0 | 0 | 0 | 1 | 0 | 0 | 0 | 1 | 0 | 0 |
| DS-50760 | 0 | 0 | 0 | 1 | 1 | 0 | 0 | 1 | 1 | 0 | 0 | 0 | 0 | 0 | 0 |
| DS-50817 | 0 | 0 | 0 | 1 | 1 | 0 | 0 | 1 | 1 | 0 | 0 | 0 | 0 | 0 | 0 |
| DS-48658 | 0 | 0 | 0 | 1 | 1 | 0 | 0 | 1 | 1 | 0 | 1 | 0 | 0 | 0 | 1 |
| DS-51942 | 0 | 0 | 0 | 1 | 1 | 0 | 0 | 1 | 0 | 1 | 0 | 1 | 0 | 0 | 0 |
| DS-49669 | 0 | 0 | 0 | 1 | 1 | 0 | 1 | 0 | 0 | 0 | 0 | 0 | 0 | 0 | 0 |
| DS-53687 | 0 | 0 | 0 | 1 | 1 | 0 | 1 | 0 | 0 | 0 | 0 | 0 | 0 | 0 | 0 |
| DS-55390 | 0 | 0 | 0 | 1 | 1 | 0 | 1 | 0 | 0 | 0 | 0 | 0 | 0 | 0 | 0 |
| DS-49665 | 0 | 0 | 0 | 1 | 1 | 0 | 1 | 0 | 0 | 0 | 0 | 0 | 0 | 0 | 1 |
| DS-56326 | 0 | 0 | 0 | 1 | 1 | 0 | 1 | 0 | 0 | 0 | 0 | 1 | 0 | 0 | 0 |
| DS-48712 | 0 | 0 | 0 | 1 | 1 | 0 | 1 | 0 | 1 | 0 | 0 | 0 | 0 | 0 | 0 |
| DS-53232 | 0 | 0 | 0 | 1 | 1 | 0 | 1 | 0 | 1 | 0 | 0 | 0 | 0 | 0 | 0 |
| DS-48909 | 0 | 0 | 0 | 1 | 1 | 0 | 1 | 0 | 1 | 0 | 0 | 1 | 0 | 0 | 0 |
| DS-52929 | 0 | 0 | 0 | 1 | 1 | 0 | 1 | 0 | 1 | 0 | 1 | 0 | 0 | 0 | 0 |
| DS-53945 | 0 | 0 | 0 | 1 | 1 | 0 | 1 | 1 | 1 | 0 | 0 | 0 | 0 | 0 | 0 |
| DS-48645 | 0 | 0 | 0 | 1 | 1 | 1 | 0 | 0 | 0 | 0 | 0 | 0 | 0 | 0 | 0 |
| DS-49373 | 0 | 0 | 0 | 1 | 1 | 1 | 0 | 0 | 0 | 0 | 0 | 0 | 0 | 0 | 0 |
| DS-51584 | 0 | 0 | 0 | 1 | 1 | 1 | 0 | 0 | 0 | 0 | 0 | 0 | 0 | 0 | 0 |
| DS-51798 | 0 | 0 | 0 | 1 | 1 | 1 | 0 | 0 | 0 | 0 | 0 | 0 | 0 | 0 | 0 |
| DS-51982 | 0 | 0 | 0 | 1 | 1 | 1 | 0 | 0 | 0 | 0 | 0 | 0 | 0 | 0 | 0 |
| DS-53731 | 0 | 0 | 0 | 1 | 1 | 1 | 0 | 0 | 0 | 0 | 0 | 1 | 0 | 0 | 0 |
| DS-50258 | 0 | 0 | 0 | 1 | 1 | 1 | 0 | 0 | 1 | 0 | 0 | 0 | 0 | 0 | 0 |
| DS-50698 | 0 | 0 | 0 | 1 | 1 | 1 | 0 | 0 | 1 | 0 | 0 | 0 | 0 | 0 | 0 |
| DS-51671 | 0 | 0 | 0 | 1 | 1 | 1 | 0 | 0 | 1 | 0 | 0 | 0 | 0 | 0 | 0 |
| DS-67027 | 0 | 0 | 0 | 1 | 1 | 1 | 0 | 0 | 1 | 0 | 0 | 0 | 0 | 0 | 0 |
| DS-49496 | 0 | 0 | 0 | 1 | 1 | 1 | 0 | 0 | 1 | 0 | 1 | 0 | 0 | 0 | 0 |
| DS-49521 | 0 | 0 | 0 | 1 | 1 | 1 | 0 | 1 | 0 | 0 | 1 | 0 | 1 | 0 | 0 |
| DS-51886 | 0 | 0 | 0 | 1 | 1 | 1 | 1 | 0 | 0 | 0 | 0 | 0 | 0 | 0 | 0 |
| DS-52095 | 0 | 0 | 0 | 1 | 1 | 1 | 1 | 0 | 0 | 1 | 0 | 0 | 0 | 0 | 0 |
| DS-49127 | 0 | 0 | 0 | 1 | 1 | 1 | 1 | 0 | 1 | 1 | 0 | 0 | 0 | 0 | 0 |
| DS-52864 | 0 | 0 | 0 | 1 | 1 | 1 | 1 | 0 | 1 | 1 | 0 | 0 | 0 | 0 | 0 |
| DS-56888 | 0 | 0 | 0 | 1 | 1 | 1 | 1 | 0 | 1 | 1 | 0 | 0 | 1 | 0 | 0 |
| DS-40203 | 0 | 1 | 0 | 0 | 0 | 0 | 0 | 0 | 0 | 0 | 0 | 0 | 0 | 0 | 0 |
| DS-48595 | 0 | 1 | 0 | 0 | 0 | 0 | 0 | 0 | 0 | 0 | 0 | 0 | 0 | 0 | 0 |
| DS-48682 | 0 | 1 | 0 | 0 | 0 | 0 | 0 | 0 | 0 | 0 | 0 | 0 | 0 | 0 | 0 |
| DS-48795 | 0 | 1 | 0 | 0 | 0 | 0 | 0 | 0 | 0 | 0 | 0 | 0 | 0 | 0 | 0 |
| DS-50692 | 0 | 1 | 0 | 0 | 0 | 0 | 0 | 0 | 0 | 0 | 0 | 0 | 0 | 0 | 0 |
| DS-50851 | 0 | 1 | 0 | 0 | 0 | 0 | 0 | 0 | 0 | 0 | 0 | 0 | 0 | 0 | 0 |
| DS-51018 | 0 | 1 | 0 | 0 | 0 | 0 | 0 | 0 | 0 | 0 | 0 | 0 | 0 | 0 | 0 |
| DS-51803 | 0 | 1 | 0 | 0 | 0 | 0 | 0 | 0 | 0 | 0 | 0 | 0 | 0 | 0 | 0 |
| DS-51941 | 0 | 1 | 0 | 0 | 0 | 0 | 0 | 0 | 0 | 0 | 0 | 0 | 0 | 0 | 0 |

|          |   |   |   |   |   |   |   |   |   |   |   |   |   |   |   |
|----------|---|---|---|---|---|---|---|---|---|---|---|---|---|---|---|
| DS-52121 | 0 | 1 | 0 | 0 | 0 | 0 | 0 | 0 | 0 | 0 | 0 | 0 | 0 | 0 | 0 |
| DS-52681 | 0 | 1 | 0 | 0 | 0 | 0 | 0 | 0 | 0 | 0 | 0 | 0 | 0 | 0 | 0 |
| DS-52756 | 0 | 1 | 0 | 0 | 0 | 0 | 0 | 0 | 0 | 0 | 0 | 0 | 0 | 0 | 0 |
| DS-52771 | 0 | 1 | 0 | 0 | 0 | 0 | 0 | 0 | 0 | 0 | 0 | 0 | 0 | 0 | 0 |
| DS-52790 | 0 | 1 | 0 | 0 | 0 | 0 | 0 | 0 | 0 | 0 | 0 | 0 | 0 | 0 | 0 |
| DS-52838 | 0 | 1 | 0 | 0 | 0 | 0 | 0 | 0 | 0 | 0 | 0 | 0 | 0 | 0 | 0 |
| DS-52882 | 0 | 1 | 0 | 0 | 0 | 0 | 0 | 0 | 0 | 0 | 0 | 0 | 0 | 0 | 0 |
| DS-52940 | 0 | 1 | 0 | 0 | 0 | 0 | 0 | 0 | 0 | 0 | 0 | 0 | 0 | 0 | 0 |
| DS-53052 | 0 | 1 | 0 | 0 | 0 | 0 | 0 | 0 | 0 | 0 | 0 | 0 | 0 | 0 | 0 |
| DS-53156 | 0 | 1 | 0 | 0 | 0 | 0 | 0 | 0 | 0 | 0 | 0 | 0 | 0 | 0 | 0 |
| DS-53453 | 0 | 1 | 0 | 0 | 0 | 0 | 0 | 0 | 0 | 0 | 0 | 0 | 0 | 0 | 0 |
| DS-53505 | 0 | 1 | 0 | 0 | 0 | 0 | 0 | 0 | 0 | 0 | 0 | 0 | 0 | 0 | 0 |
| DS-53835 | 0 | 1 | 0 | 0 | 0 | 0 | 0 | 0 | 0 | 0 | 0 | 0 | 0 | 0 | 0 |
| DS-54072 | 0 | 1 | 0 | 0 | 0 | 0 | 0 | 0 | 0 | 0 | 0 | 0 | 0 | 0 | 0 |
| DS-54148 | 0 | 1 | 0 | 0 | 0 | 0 | 0 | 0 | 0 | 0 | 0 | 0 | 0 | 0 | 0 |
| DS-54195 | 0 | 1 | 0 | 0 | 0 | 0 | 0 | 0 | 0 | 0 | 0 | 0 | 0 | 0 | 0 |
| DS-54327 | 0 | 1 | 0 | 0 | 0 | 0 | 0 | 0 | 0 | 0 | 0 | 0 | 0 | 0 | 0 |
| DS-54393 | 0 | 1 | 0 | 0 | 0 | 0 | 0 | 0 | 0 | 0 | 0 | 0 | 0 | 0 | 0 |
| DS-54429 | 0 | 1 | 0 | 0 | 0 | 0 | 0 | 0 | 0 | 0 | 0 | 0 | 0 | 0 | 0 |
| DS-54452 | 0 | 1 | 0 | 0 | 0 | 0 | 0 | 0 | 0 | 0 | 0 | 0 | 0 | 0 | 0 |
| DS-54556 | 0 | 1 | 0 | 0 | 0 | 0 | 0 | 0 | 0 | 0 | 0 | 0 | 0 | 0 | 0 |
| DS-54569 | 0 | 1 | 0 | 0 | 0 | 0 | 0 | 0 | 0 | 0 | 0 | 0 | 0 | 0 | 0 |
| DS-54679 | 0 | 1 | 0 | 0 | 0 | 0 | 0 | 0 | 0 | 0 | 0 | 0 | 0 | 0 | 0 |
| DS-55324 | 0 | 1 | 0 | 0 | 0 | 0 | 0 | 0 | 0 | 0 | 0 | 0 | 0 | 0 | 0 |
| DS-55383 | 0 | 1 | 0 | 0 | 0 | 0 | 0 | 0 | 0 | 0 | 0 | 0 | 0 | 0 | 0 |
| DS-56094 | 0 | 1 | 0 | 0 | 0 | 0 | 0 | 0 | 0 | 0 | 0 | 0 | 0 | 0 | 0 |
| DS-56803 | 0 | 1 | 0 | 0 | 0 | 0 | 0 | 0 | 0 | 0 | 0 | 0 | 0 | 0 | 0 |
| DS-56894 | 0 | 1 | 0 | 0 | 0 | 0 | 0 | 0 | 0 | 0 | 0 | 0 | 0 | 0 | 0 |
| DS-56962 | 0 | 1 | 0 | 0 | 0 | 0 | 0 | 0 | 0 | 0 | 0 | 0 | 0 | 0 | 0 |
| DS-57013 | 0 | 1 | 0 | 0 | 0 | 0 | 0 | 0 | 0 | 0 | 0 | 0 | 0 | 0 | 0 |
| DS-57035 | 0 | 1 | 0 | 0 | 0 | 0 | 0 | 0 | 0 | 0 | 0 | 0 | 0 | 0 | 0 |
| DS-57927 | 0 | 1 | 0 | 0 | 0 | 0 | 0 | 0 | 0 | 0 | 0 | 0 | 0 | 0 | 0 |
| DS-58258 | 0 | 1 | 0 | 0 | 0 | 0 | 0 | 0 | 0 | 0 | 0 | 0 | 0 | 0 | 0 |
| DS-67827 | 0 | 1 | 0 | 0 | 0 | 0 | 0 | 0 | 0 | 0 | 0 | 0 | 0 | 0 | 0 |
| DS-67949 | 0 | 1 | 0 | 0 | 0 | 0 | 0 | 0 | 0 | 0 | 0 | 0 | 0 | 0 | 0 |
| DS-69689 | 0 | 1 | 0 | 0 | 0 | 0 | 0 | 0 | 0 | 0 | 0 | 0 | 0 | 0 | 0 |
| DS-87910 | 0 | 1 | 0 | 0 | 0 | 0 | 0 | 0 | 0 | 0 | 0 | 0 | 0 | 0 | 0 |
| DS-67980 | 0 | 1 | 0 | 0 | 1 | 0 | 0 | 0 | 0 | 0 | 0 | 0 | 0 | 1 | 0 |
| DS-53132 | 0 | 1 | 0 | 0 | 1 | 0 | 0 | 0 | 0 | 0 | 0 | 0 | 0 | 1 | 1 |
| DS-51050 | 0 | 1 | 0 | 0 | 1 | 0 | 0 | 0 | 1 | 0 | 0 | 0 | 0 | 0 | 0 |
| DS-53298 | 0 | 1 | 0 | 0 | 1 | 0 | 0 | 0 | 1 | 0 | 0 | 0 | 0 | 0 | 0 |
| DS-53482 | 0 | 1 | 0 | 0 | 1 | 0 | 0 | 0 | 1 | 0 | 0 | 0 | 0 | 0 | 0 |
| DS-67030 | 0 | 1 | 0 | 0 | 1 | 0 | 0 | 0 | 1 | 0 | 0 | 0 | 0 | 0 | 0 |

|          |   |   |   |   |   |   |   |   |   |   |   |   |   |   |
|----------|---|---|---|---|---|---|---|---|---|---|---|---|---|---|
| DS-48833 | 0 | 1 | 0 | 0 | 1 | 0 | 0 | 0 | 0 | 1 | 0 | 0 | 0 | 0 |
| DS-49498 | 0 | 1 | 0 | 0 | 1 | 0 | 0 | 0 | 0 | 1 | 0 | 0 | 0 | 0 |
| DS-50536 | 0 | 1 | 0 | 0 | 1 | 0 | 0 | 0 | 0 | 1 | 0 | 0 | 0 | 0 |
| DS-51766 | 0 | 1 | 0 | 0 | 1 | 0 | 0 | 0 | 0 | 1 | 0 | 0 | 0 | 0 |
| DS-52569 | 0 | 1 | 0 | 0 | 1 | 0 | 0 | 0 | 0 | 1 | 0 | 0 | 0 | 0 |
| DS-53728 | 0 | 1 | 0 | 0 | 1 | 0 | 0 | 0 | 0 | 1 | 0 | 0 | 0 | 0 |
| DS-48670 | 0 | 1 | 0 | 0 | 1 | 0 | 0 | 1 | 1 | 0 | 0 | 0 | 0 | 0 |
| DS-50521 | 0 | 1 | 0 | 0 | 1 | 0 | 0 | 1 | 0 | 0 | 0 | 0 | 0 | 0 |
| DS-50626 | 0 | 1 | 0 | 0 | 1 | 0 | 0 | 1 | 0 | 0 | 0 | 0 | 0 | 0 |
| DS-52871 | 0 | 1 | 0 | 0 | 1 | 0 | 0 | 1 | 0 | 0 | 0 | 0 | 0 | 0 |
| DS-52888 | 0 | 1 | 0 | 0 | 1 | 0 | 0 | 1 | 0 | 0 | 0 | 0 | 0 | 0 |
| DS-53129 | 0 | 1 | 0 | 0 | 1 | 0 | 0 | 1 | 0 | 0 | 0 | 0 | 0 | 0 |
| DS-54674 | 0 | 1 | 0 | 0 | 1 | 0 | 0 | 1 | 0 | 0 | 0 | 0 | 0 | 0 |
| DS-54751 | 0 | 1 | 0 | 0 | 1 | 0 | 0 | 1 | 0 | 0 | 0 | 0 | 0 | 0 |
| DS-56668 | 0 | 1 | 0 | 0 | 1 | 0 | 0 | 1 | 1 | 0 | 0 | 0 | 0 | 0 |
| DS-53095 | 0 | 1 | 0 | 0 | 1 | 0 | 1 | 0 | 0 | 0 | 0 | 0 | 0 | 0 |
| DS-53143 | 0 | 1 | 0 | 0 | 1 | 0 | 1 | 0 | 0 | 0 | 0 | 0 | 0 | 0 |
| DS-68849 | 0 | 1 | 0 | 0 | 1 | 0 | 1 | 0 | 0 | 0 | 0 | 0 | 0 | 0 |
| DS-49826 | 0 | 1 | 0 | 0 | 1 | 0 | 1 | 0 | 1 | 0 | 0 | 0 | 0 | 0 |
| DS-67953 | 0 | 1 | 0 | 0 | 1 | 0 | 1 | 0 | 1 | 0 | 0 | 0 | 0 | 0 |
| DS-53295 | 0 | 1 | 0 | 0 | 1 | 0 | 1 | 1 | 0 | 0 | 0 | 0 | 0 | 0 |
| DS-48649 | 0 | 1 | 0 | 0 | 1 | 1 | 0 | 0 | 0 | 0 | 0 | 0 | 0 | 0 |
| DS-49425 | 0 | 1 | 0 | 0 | 1 | 1 | 0 | 0 | 0 | 0 | 0 | 0 | 0 | 0 |
| DS-56858 | 0 | 1 | 0 | 0 | 1 | 1 | 0 | 0 | 0 | 0 | 0 | 0 | 0 | 0 |
| DS-57955 | 0 | 1 | 0 | 0 | 1 | 1 | 0 | 0 | 0 | 0 | 0 | 0 | 0 | 0 |
| DS-59932 | 0 | 1 | 0 | 0 | 1 | 1 | 0 | 0 | 0 | 0 | 0 | 0 | 0 | 0 |
| DS-51875 | 0 | 1 | 0 | 0 | 1 | 1 | 0 | 0 | 0 | 0 | 1 | 0 | 0 | 0 |
| DS-58341 | 0 | 1 | 0 | 0 | 1 | 1 | 0 | 0 | 1 | 0 | 0 | 0 | 0 | 0 |
| DS-50648 | 0 | 1 | 0 | 0 | 1 | 1 | 0 | 1 | 0 | 0 | 0 | 0 | 0 | 0 |
| DS-53972 | 0 | 1 | 0 | 1 | 1 | 0 | 0 | 0 | 1 | 0 | 0 | 0 | 0 | 0 |
| DS-51086 | 0 | 1 | 0 | 1 | 1 | 1 | 0 | 1 | 0 | 0 | 0 | 0 | 0 | 1 |
| DS-52912 | 0 | 1 | 0 | 1 | 1 | 1 | 1 | 0 | 0 | 0 | 1 | 0 | 0 | 1 |
| DS-44878 | 0 | 1 | 1 | 0 | 0 | 0 | 0 | 0 | 0 | 0 | 0 | 0 | 0 | 0 |
| DS-48592 | 0 | 1 | 1 | 0 | 0 | 0 | 0 | 0 | 0 | 0 | 0 | 0 | 0 | 0 |
| DS-48921 | 0 | 1 | 1 | 0 | 0 | 0 | 0 | 0 | 0 | 0 | 0 | 0 | 0 | 0 |
| DS-49637 | 0 | 1 | 1 | 0 | 0 | 0 | 0 | 0 | 0 | 0 | 0 | 0 | 0 | 0 |
| DS-49730 | 0 | 1 | 1 | 0 | 0 | 0 | 0 | 0 | 0 | 0 | 0 | 0 | 0 | 0 |
| DS-50529 | 0 | 1 | 1 | 0 | 0 | 0 | 0 | 0 | 0 | 0 | 0 | 0 | 0 | 0 |
| DS-51087 | 0 | 1 | 1 | 0 | 0 | 0 | 0 | 0 | 0 | 0 | 0 | 0 | 0 | 0 |
| DS-51527 | 0 | 1 | 1 | 0 | 0 | 0 | 0 | 0 | 0 | 0 | 0 | 0 | 0 | 0 |
| DS-51878 | 0 | 1 | 1 | 0 | 0 | 0 | 0 | 0 | 0 | 0 | 0 | 0 | 0 | 0 |
| DS-51923 | 0 | 1 | 1 | 0 | 0 | 0 | 0 | 0 | 0 | 0 | 0 | 0 | 0 | 0 |
| DS-51977 | 0 | 1 | 1 | 0 | 0 | 0 | 0 | 0 | 0 | 0 | 0 | 0 | 0 | 0 |

|          |   |   |   |   |   |   |   |   |   |   |   |   |   |   |   |
|----------|---|---|---|---|---|---|---|---|---|---|---|---|---|---|---|
| DS-52111 | 0 | 1 | 1 | 0 | 0 | 0 | 0 | 0 | 0 | 0 | 0 | 0 | 0 | 0 | 0 |
| DS-52151 | 0 | 1 | 1 | 0 | 0 | 0 | 0 | 0 | 0 | 0 | 0 | 0 | 0 | 0 | 0 |
| DS-52359 | 0 | 1 | 1 | 0 | 0 | 0 | 0 | 0 | 0 | 0 | 0 | 0 | 0 | 0 | 0 |
| DS-52889 | 0 | 1 | 1 | 0 | 0 | 0 | 0 | 0 | 0 | 0 | 0 | 0 | 0 | 0 | 0 |
| DS-53661 | 0 | 1 | 1 | 0 | 0 | 0 | 0 | 0 | 0 | 0 | 0 | 0 | 0 | 0 | 0 |
| DS-54062 | 0 | 1 | 1 | 0 | 0 | 0 | 0 | 0 | 0 | 0 | 0 | 0 | 0 | 0 | 0 |
| DS-54129 | 0 | 1 | 1 | 0 | 0 | 0 | 0 | 0 | 0 | 0 | 0 | 0 | 0 | 0 | 0 |
| DS-54255 | 0 | 1 | 1 | 0 | 0 | 0 | 0 | 0 | 0 | 0 | 0 | 0 | 0 | 0 | 0 |
| DS-54355 | 0 | 1 | 1 | 0 | 0 | 0 | 0 | 0 | 0 | 0 | 0 | 0 | 0 | 0 | 0 |
| DS-54724 | 0 | 1 | 1 | 0 | 0 | 0 | 0 | 0 | 0 | 0 | 0 | 0 | 0 | 0 | 0 |
| DS-54737 | 0 | 1 | 1 | 0 | 0 | 0 | 0 | 0 | 0 | 0 | 0 | 0 | 0 | 0 | 0 |
| DS-54845 | 0 | 1 | 1 | 0 | 0 | 0 | 0 | 0 | 0 | 0 | 0 | 0 | 0 | 0 | 0 |
| DS-56118 | 0 | 1 | 1 | 0 | 0 | 0 | 0 | 0 | 0 | 0 | 0 | 0 | 0 | 0 | 0 |
| DS-56176 | 0 | 1 | 1 | 0 | 0 | 0 | 0 | 0 | 0 | 0 | 0 | 0 | 0 | 0 | 0 |
| DS-56348 | 0 | 1 | 1 | 0 | 0 | 0 | 0 | 0 | 0 | 0 | 0 | 0 | 0 | 0 | 0 |
| DS-56384 | 0 | 1 | 1 | 0 | 0 | 0 | 0 | 0 | 0 | 0 | 0 | 0 | 0 | 0 | 0 |
| DS-56964 | 0 | 1 | 1 | 0 | 0 | 0 | 0 | 0 | 0 | 0 | 0 | 0 | 0 | 0 | 0 |
| DS-57008 | 0 | 1 | 1 | 0 | 0 | 0 | 0 | 0 | 0 | 0 | 0 | 0 | 0 | 0 | 0 |
| DS-57026 | 0 | 1 | 1 | 0 | 0 | 0 | 0 | 0 | 0 | 0 | 0 | 0 | 0 | 0 | 0 |
| DS-58141 | 0 | 1 | 1 | 0 | 0 | 0 | 0 | 0 | 0 | 0 | 0 | 0 | 0 | 0 | 0 |
| DS-58440 | 0 | 1 | 1 | 0 | 0 | 0 | 0 | 0 | 0 | 0 | 0 | 0 | 0 | 0 | 0 |
| DS-60341 | 0 | 1 | 1 | 0 | 0 | 0 | 0 | 0 | 0 | 0 | 0 | 0 | 0 | 0 | 0 |
| DS-61202 | 0 | 1 | 1 | 0 | 0 | 0 | 0 | 0 | 0 | 0 | 0 | 0 | 0 | 0 | 0 |
| DS-48808 | 0 | 1 | 1 | 0 | 1 | 0 | 0 | 0 | 1 | 0 | 0 | 0 | 0 | 0 | 0 |
| DS-53115 | 0 | 1 | 1 | 0 | 1 | 0 | 0 | 0 | 1 | 0 | 0 | 0 | 0 | 0 | 0 |
| DS-53121 | 0 | 1 | 1 | 0 | 1 | 0 | 0 | 0 | 1 | 0 | 0 | 0 | 0 | 0 | 0 |
| DS-48655 | 0 | 1 | 1 | 0 | 1 | 0 | 0 | 0 | 0 | 1 | 0 | 0 | 0 | 0 | 0 |
| DS-49417 | 0 | 1 | 1 | 0 | 1 | 0 | 0 | 0 | 0 | 1 | 0 | 0 | 0 | 0 | 0 |
| DS-50772 | 0 | 1 | 1 | 0 | 1 | 0 | 0 | 1 | 0 | 0 | 0 | 0 | 0 | 0 | 0 |
| DS-54439 | 0 | 1 | 1 | 0 | 1 | 0 | 0 | 1 | 0 | 1 | 0 | 0 | 0 | 0 | 0 |
| DS-50723 | 0 | 1 | 1 | 0 | 1 | 0 | 1 | 0 | 0 | 0 | 0 | 0 | 0 | 0 | 0 |
| DS-67162 | 0 | 1 | 1 | 0 | 1 | 0 | 1 | 0 | 0 | 0 | 0 | 0 | 0 | 0 | 0 |
| DS-51121 | 0 | 1 | 1 | 0 | 1 | 0 | 1 | 0 | 1 | 0 | 1 | 0 | 0 | 0 | 0 |
| DS-55407 | 0 | 1 | 1 | 0 | 1 | 0 | 1 | 1 | 0 | 0 | 0 | 0 | 0 | 0 | 0 |
| DS-53969 | 0 | 1 | 1 | 0 | 1 | 1 | 0 | 0 | 0 | 0 | 0 | 0 | 0 | 0 | 0 |
| DS-54782 | 0 | 2 | 0 | 0 | 0 | 0 | 0 | 0 | 0 | 0 | 0 | 0 | 0 | 0 | 0 |
| DS-54928 | 0 | 2 | 0 | 0 | 0 | 0 | 0 | 0 | 0 | 0 | 0 | 0 | 0 | 0 | 0 |
| DS-67065 | 0 | 2 | 0 | 0 | 0 | 0 | 0 | 0 | 0 | 0 | 0 | 0 | 0 | 0 | 0 |
| DS-50931 | 0 | 2 | 0 | 0 | 1 | 0 | 0 | 1 | 0 | 0 | 0 | 0 | 0 | 0 | 0 |
| DS-50573 | 0 | 2 | 0 | 0 | 1 | 0 | 1 | 0 | 0 | 0 | 0 | 0 | 0 | 0 | 0 |
| DS-60296 | 0 | 2 | 0 | 0 | 1 | 1 | 0 | 0 | 0 | 0 | 0 | 0 | 0 | 0 | 0 |
| DS-49796 | 0 | 2 | 1 | 0 | 0 | 0 | 0 | 0 | 0 | 0 | 0 | 0 | 0 | 0 | 0 |
| DS-53494 | 0 | 2 | 1 | 0 | 0 | 0 | 0 | 0 | 0 | 0 | 0 | 0 | 0 | 0 | 0 |



|          |   |   |   |   |   |   |   |   |   |   |   |   |   |   |   |
|----------|---|---|---|---|---|---|---|---|---|---|---|---|---|---|---|
| DS-48823 | 1 | 0 | 0 | 0 | 0 | 0 | 0 | 0 | 0 | 0 | 0 | 0 | 0 | 0 | 0 |
| DS-50568 | 1 | 0 | 0 | 0 | 0 | 0 | 0 | 0 | 0 | 0 | 0 | 0 | 0 | 0 | 0 |
| DS-50796 | 1 | 0 | 0 | 0 | 0 | 0 | 0 | 0 | 0 | 0 | 0 | 0 | 0 | 0 | 0 |
| DS-51630 | 1 | 0 | 0 | 0 | 0 | 0 | 0 | 0 | 0 | 0 | 0 | 0 | 0 | 0 | 0 |
| DS-52022 | 1 | 0 | 0 | 0 | 0 | 0 | 0 | 0 | 0 | 0 | 0 | 0 | 0 | 0 | 0 |
| DS-52131 | 1 | 0 | 0 | 0 | 0 | 0 | 0 | 0 | 0 | 0 | 0 | 0 | 0 | 0 | 0 |
| DS-52369 | 1 | 0 | 0 | 0 | 0 | 0 | 0 | 0 | 0 | 0 | 0 | 0 | 0 | 0 | 0 |
| DS-53385 | 1 | 0 | 0 | 0 | 0 | 0 | 0 | 0 | 0 | 0 | 0 | 0 | 0 | 0 | 0 |
| DS-53481 | 1 | 0 | 0 | 0 | 0 | 0 | 0 | 0 | 0 | 0 | 0 | 0 | 0 | 0 | 0 |
| DS-53736 | 1 | 0 | 0 | 0 | 0 | 0 | 0 | 0 | 0 | 0 | 0 | 0 | 0 | 0 | 0 |
| DS-54009 | 1 | 0 | 0 | 0 | 0 | 0 | 0 | 0 | 0 | 0 | 0 | 0 | 0 | 0 | 0 |
| DS-54089 | 1 | 0 | 0 | 0 | 0 | 0 | 0 | 0 | 0 | 0 | 0 | 0 | 0 | 0 | 0 |
| DS-54391 | 1 | 0 | 0 | 0 | 0 | 0 | 0 | 0 | 0 | 0 | 0 | 0 | 0 | 0 | 0 |
| DS-54697 | 1 | 0 | 0 | 0 | 0 | 0 | 0 | 0 | 0 | 0 | 0 | 0 | 0 | 0 | 0 |
| DS-55379 | 1 | 0 | 0 | 0 | 0 | 0 | 0 | 0 | 0 | 0 | 0 | 0 | 0 | 0 | 0 |
| DS-56101 | 1 | 0 | 0 | 0 | 0 | 0 | 0 | 0 | 0 | 0 | 0 | 0 | 0 | 0 | 0 |
| DS-56310 | 1 | 0 | 0 | 0 | 0 | 0 | 0 | 0 | 0 | 0 | 0 | 0 | 0 | 0 | 0 |
| DS-56626 | 1 | 0 | 0 | 0 | 0 | 0 | 0 | 0 | 0 | 0 | 0 | 0 | 0 | 0 | 0 |
| DS-56683 | 1 | 0 | 0 | 0 | 0 | 0 | 0 | 0 | 0 | 0 | 0 | 0 | 0 | 0 | 0 |
| DS-56842 | 1 | 0 | 0 | 0 | 0 | 0 | 0 | 0 | 0 | 0 | 0 | 0 | 0 | 0 | 0 |
| DS-58234 | 1 | 0 | 0 | 0 | 0 | 0 | 0 | 0 | 0 | 0 | 0 | 0 | 0 | 0 | 0 |
| DS-67013 | 1 | 0 | 0 | 0 | 0 | 0 | 0 | 0 | 0 | 0 | 0 | 0 | 0 | 0 | 0 |
| DS-70294 | 1 | 0 | 0 | 0 | 0 | 0 | 0 | 0 | 0 | 0 | 0 | 0 | 0 | 0 | 0 |
| DS-52210 | 1 | 0 | 0 | 0 | 1 | 0 | 0 | 0 | 0 | 0 | 0 | 1 | 0 | 0 | 0 |
| DS-52853 | 1 | 0 | 0 | 0 | 1 | 0 | 0 | 0 | 0 | 0 | 0 | 0 | 1 | 0 | 0 |
| DS-47369 | 1 | 0 | 0 | 0 | 1 | 0 | 0 | 0 | 1 | 0 | 0 | 0 | 0 | 0 | 0 |
| DS-53246 | 1 | 0 | 0 | 0 | 1 | 0 | 0 | 0 | 1 | 0 | 0 | 0 | 0 | 0 | 0 |
| DS-48764 | 1 | 0 | 0 | 0 | 1 | 0 | 0 | 0 | 0 | 1 | 0 | 0 | 0 | 0 | 0 |
| DS-50827 | 1 | 0 | 0 | 0 | 1 | 0 | 0 | 0 | 0 | 1 | 0 | 0 | 0 | 0 | 0 |
| DS-53272 | 1 | 0 | 0 | 0 | 1 | 0 | 0 | 0 | 0 | 1 | 0 | 0 | 0 | 0 | 0 |
| DS-54041 | 1 | 0 | 0 | 0 | 1 | 0 | 0 | 0 | 0 | 1 | 0 | 0 | 0 | 0 | 0 |
| DS-58275 | 1 | 0 | 0 | 0 | 1 | 0 | 0 | 0 | 0 | 1 | 0 | 0 | 0 | 0 | 0 |
| DS-60252 | 1 | 0 | 0 | 0 | 1 | 0 | 0 | 0 | 0 | 1 | 0 | 0 | 0 | 0 | 0 |
| DS-67994 | 1 | 0 | 0 | 0 | 1 | 0 | 0 | 0 | 0 | 1 | 0 | 0 | 0 | 0 | 0 |
| DS-51676 | 1 | 0 | 0 | 0 | 1 | 0 | 0 | 1 | 0 | 0 | 0 | 0 | 0 | 0 | 0 |
| DS-48607 | 1 | 0 | 0 | 0 | 1 | 1 | 0 | 0 | 0 | 0 | 0 | 0 | 0 | 0 | 0 |
| DS-49325 | 1 | 0 | 0 | 0 | 1 | 1 | 0 | 0 | 0 | 0 | 0 | 0 | 0 | 0 | 0 |
| DS-52942 | 1 | 0 | 0 | 0 | 1 | 1 | 0 | 0 | 0 | 0 | 0 | 0 | 1 | 0 | 0 |
| DS-67955 | 1 | 0 | 0 | 0 | 1 | 1 | 0 | 1 | 1 | 1 | 0 | 0 | 0 | 0 | 0 |
| DS-53424 | 1 | 0 | 0 | 0 | 1 | 1 | 1 | 0 | 0 | 0 | 0 | 0 | 0 | 0 | 0 |
| DS-48929 | 1 | 0 | 0 | 1 | 1 | 0 | 1 | 0 | 1 | 0 | 0 | 0 | 0 | 0 | 0 |
| DS-48789 | 1 | 0 | 0 | 1 | 1 | 1 | 0 | 0 | 0 | 0 | 0 | 0 | 0 | 0 | 0 |
| DS-50855 | 1 | 0 | 0 | 1 | 1 | 1 | 0 | 0 | 0 | 1 | 0 | 0 | 0 | 0 | 0 |

|          |   |   |   |   |   |   |   |   |   |   |   |   |   |   |   |
|----------|---|---|---|---|---|---|---|---|---|---|---|---|---|---|---|
| DS-51220 | 1 | 0 | 0 | 1 | 1 | 1 | 0 | 1 | 0 | 0 | 0 | 0 | 0 | 0 | 0 |
| DS-49718 | 1 | 0 | 1 | 0 | 0 | 0 | 0 | 0 | 0 | 0 | 0 | 0 | 0 | 0 | 0 |
| DS-50725 | 1 | 0 | 1 | 0 | 0 | 0 | 0 | 0 | 0 | 0 | 0 | 0 | 0 | 0 | 0 |
| DS-50739 | 1 | 0 | 1 | 0 | 0 | 0 | 0 | 0 | 0 | 0 | 0 | 0 | 0 | 0 | 0 |
| DS-51821 | 1 | 0 | 1 | 0 | 0 | 0 | 0 | 0 | 0 | 0 | 0 | 0 | 0 | 0 | 0 |
| DS-53191 | 1 | 0 | 1 | 0 | 0 | 0 | 0 | 0 | 0 | 0 | 0 | 0 | 0 | 0 | 0 |
| DS-54015 | 1 | 0 | 1 | 0 | 0 | 0 | 0 | 0 | 0 | 0 | 0 | 0 | 0 | 0 | 0 |
| DS-54589 | 1 | 0 | 1 | 0 | 0 | 0 | 0 | 0 | 0 | 0 | 0 | 0 | 0 | 0 | 0 |
| DS-56678 | 1 | 0 | 1 | 0 | 0 | 0 | 0 | 0 | 0 | 0 | 0 | 0 | 0 | 0 | 0 |
| DS-55384 | 1 | 0 | 1 | 0 | 1 | 0 | 0 | 0 | 1 | 0 | 0 | 0 | 0 | 0 | 0 |
| DS-67956 | 1 | 0 | 1 | 0 | 1 | 0 | 0 | 0 | 1 | 0 | 0 | 0 | 0 | 0 | 0 |
| DS-51932 | 1 | 0 | 1 | 0 | 1 | 0 | 0 | 1 | 0 | 0 | 0 | 0 | 0 | 0 | 0 |
| DS-67844 | 1 | 0 | 1 | 0 | 1 | 0 | 1 | 1 | 1 | 0 | 0 | 1 | 0 | 0 | 0 |
| DS-52320 | 1 | 0 | 1 | 0 | 1 | 1 | 0 | 0 | 0 | 0 | 0 | 0 | 0 | 0 | 0 |
| DS-44604 | 1 | 1 | 0 | 0 | 0 | 0 | 0 | 0 | 0 | 0 | 0 | 0 | 0 | 0 | 0 |
| DS-44863 | 1 | 1 | 0 | 0 | 0 | 0 | 0 | 0 | 0 | 0 | 0 | 0 | 0 | 0 | 0 |
| DS-48739 | 1 | 1 | 0 | 0 | 0 | 0 | 0 | 0 | 0 | 0 | 0 | 0 | 0 | 0 | 0 |
| DS-48827 | 1 | 1 | 0 | 0 | 0 | 0 | 0 | 0 | 0 | 0 | 0 | 0 | 0 | 0 | 0 |
| DS-48857 | 1 | 1 | 0 | 0 | 0 | 0 | 0 | 0 | 0 | 0 | 0 | 0 | 0 | 0 | 0 |
| DS-49395 | 1 | 1 | 0 | 0 | 0 | 0 | 0 | 0 | 0 | 0 | 0 | 0 | 0 | 0 | 0 |
| DS-49435 | 1 | 1 | 0 | 0 | 0 | 0 | 0 | 0 | 0 | 0 | 0 | 0 | 0 | 0 | 0 |
| DS-49441 | 1 | 1 | 0 | 0 | 0 | 0 | 0 | 0 | 0 | 0 | 0 | 0 | 0 | 0 | 0 |
| DS-49459 | 1 | 1 | 0 | 0 | 0 | 0 | 0 | 0 | 0 | 0 | 0 | 0 | 0 | 0 | 0 |
| DS-50652 | 1 | 1 | 0 | 0 | 0 | 0 | 0 | 0 | 0 | 0 | 0 | 0 | 0 | 0 | 0 |
| DS-50685 | 1 | 1 | 0 | 0 | 0 | 0 | 0 | 0 | 0 | 0 | 0 | 0 | 0 | 0 | 0 |
| DS-50687 | 1 | 1 | 0 | 0 | 0 | 0 | 0 | 0 | 0 | 0 | 0 | 0 | 0 | 0 | 0 |
| DS-50788 | 1 | 1 | 0 | 0 | 0 | 0 | 0 | 0 | 0 | 0 | 0 | 0 | 0 | 0 | 0 |
| DS-50812 | 1 | 1 | 0 | 0 | 0 | 0 | 0 | 0 | 0 | 0 | 0 | 0 | 0 | 0 | 0 |
| DS-50890 | 1 | 1 | 0 | 0 | 0 | 0 | 0 | 0 | 0 | 0 | 0 | 0 | 0 | 0 | 0 |
| DS-51088 | 1 | 1 | 0 | 0 | 0 | 0 | 0 | 0 | 0 | 0 | 0 | 0 | 0 | 0 | 0 |
| DS-51769 | 1 | 1 | 0 | 0 | 0 | 0 | 0 | 0 | 0 | 0 | 0 | 0 | 0 | 0 | 0 |
| DS-51797 | 1 | 1 | 0 | 0 | 0 | 0 | 0 | 0 | 0 | 0 | 0 | 0 | 0 | 0 | 0 |
| DS-51997 | 1 | 1 | 0 | 0 | 0 | 0 | 0 | 0 | 0 | 0 | 0 | 0 | 0 | 0 | 0 |
| DS-51998 | 1 | 1 | 0 | 0 | 0 | 0 | 0 | 0 | 0 | 0 | 0 | 0 | 0 | 0 | 0 |
| DS-52837 | 1 | 1 | 0 | 0 | 0 | 0 | 0 | 0 | 0 | 0 | 0 | 0 | 0 | 0 | 0 |
| DS-52992 | 1 | 1 | 0 | 0 | 0 | 0 | 0 | 0 | 0 | 0 | 0 | 0 | 0 | 0 | 0 |
| DS-53055 | 1 | 1 | 0 | 0 | 0 | 0 | 0 | 0 | 0 | 0 | 0 | 0 | 0 | 0 | 0 |
| DS-53138 | 1 | 1 | 0 | 0 | 0 | 0 | 0 | 0 | 0 | 0 | 0 | 0 | 0 | 0 | 0 |
| DS-53139 | 1 | 1 | 0 | 0 | 0 | 0 | 0 | 0 | 0 | 0 | 0 | 0 | 0 | 0 | 0 |
| DS-53189 | 1 | 1 | 0 | 0 | 0 | 0 | 0 | 0 | 0 | 0 | 0 | 0 | 0 | 0 | 0 |
| DS-53408 | 1 | 1 | 0 | 0 | 0 | 0 | 0 | 0 | 0 | 0 | 0 | 0 | 0 | 0 | 0 |
| DS-53644 | 1 | 1 | 0 | 0 | 0 | 0 | 0 | 0 | 0 | 0 | 0 | 0 | 0 | 0 | 0 |
| DS-53664 | 1 | 1 | 0 | 0 | 0 | 0 | 0 | 0 | 0 | 0 | 0 | 0 | 0 | 0 | 0 |

|          |   |   |   |   |   |   |   |   |   |   |   |   |   |   |   |
|----------|---|---|---|---|---|---|---|---|---|---|---|---|---|---|---|
| DS-54307 | 1 | 1 | 0 | 0 | 0 | 0 | 0 | 0 | 0 | 0 | 0 | 0 | 0 | 0 | 0 |
| DS-54363 | 1 | 1 | 0 | 0 | 0 | 0 | 0 | 0 | 0 | 0 | 0 | 0 | 0 | 0 | 0 |
| DS-54503 | 1 | 1 | 0 | 0 | 0 | 0 | 0 | 0 | 0 | 0 | 0 | 0 | 0 | 0 | 0 |
| DS-54841 | 1 | 1 | 0 | 0 | 0 | 0 | 0 | 0 | 0 | 0 | 0 | 0 | 0 | 0 | 0 |
| DS-54925 | 1 | 1 | 0 | 0 | 0 | 0 | 0 | 0 | 0 | 0 | 0 | 0 | 0 | 0 | 0 |
| DS-55355 | 1 | 1 | 0 | 0 | 0 | 0 | 0 | 0 | 0 | 0 | 0 | 0 | 0 | 0 | 0 |
| DS-55388 | 1 | 1 | 0 | 0 | 0 | 0 | 0 | 0 | 0 | 0 | 0 | 0 | 0 | 0 | 0 |
| DS-56080 | 1 | 1 | 0 | 0 | 0 | 0 | 0 | 0 | 0 | 0 | 0 | 0 | 0 | 0 | 0 |
| DS-56293 | 1 | 1 | 0 | 0 | 0 | 0 | 0 | 0 | 0 | 0 | 0 | 0 | 0 | 0 | 0 |
| DS-56397 | 1 | 1 | 0 | 0 | 0 | 0 | 0 | 0 | 0 | 0 | 0 | 0 | 0 | 0 | 0 |
| DS-56421 | 1 | 1 | 0 | 0 | 0 | 0 | 0 | 0 | 0 | 0 | 0 | 0 | 0 | 0 | 0 |
| DS-56829 | 1 | 1 | 0 | 0 | 0 | 0 | 0 | 0 | 0 | 0 | 0 | 0 | 0 | 0 | 0 |
| DS-56830 | 1 | 1 | 0 | 0 | 0 | 0 | 0 | 0 | 0 | 0 | 0 | 0 | 0 | 0 | 0 |
| DS-56949 | 1 | 1 | 0 | 0 | 0 | 0 | 0 | 0 | 0 | 0 | 0 | 0 | 0 | 0 | 0 |
| DS-57041 | 1 | 1 | 0 | 0 | 0 | 0 | 0 | 0 | 0 | 0 | 0 | 0 | 0 | 0 | 0 |
| DS-58548 | 1 | 1 | 0 | 0 | 0 | 0 | 0 | 0 | 0 | 0 | 0 | 0 | 0 | 0 | 0 |
| DS-58694 | 1 | 1 | 0 | 0 | 0 | 0 | 0 | 0 | 0 | 0 | 0 | 0 | 0 | 0 | 0 |
| DS-60313 | 1 | 1 | 0 | 0 | 0 | 0 | 0 | 0 | 0 | 0 | 0 | 0 | 0 | 0 | 0 |
| DS-67914 | 1 | 1 | 0 | 0 | 0 | 0 | 0 | 0 | 0 | 0 | 0 | 0 | 0 | 0 | 0 |
| DS-69122 | 1 | 1 | 0 | 0 | 0 | 0 | 0 | 0 | 0 | 0 | 0 | 0 | 0 | 0 | 0 |
| DS-69164 | 1 | 1 | 0 | 0 | 0 | 0 | 0 | 0 | 0 | 0 | 0 | 0 | 0 | 0 | 0 |
| DS-53249 | 1 | 1 | 0 | 0 | 1 | 0 | 0 | 0 | 0 | 0 | 0 | 1 | 0 | 0 | 0 |
| DS-56740 | 1 | 1 | 0 | 0 | 1 | 0 | 0 | 0 | 0 | 0 | 0 | 1 | 0 | 0 | 0 |
| DS-50805 | 1 | 1 | 0 | 0 | 1 | 0 | 0 | 0 | 0 | 0 | 1 | 1 | 0 | 0 | 0 |
| DS-51028 | 1 | 1 | 0 | 0 | 1 | 0 | 0 | 0 | 1 | 0 | 0 | 0 | 0 | 0 | 0 |
| DS-57686 | 1 | 1 | 0 | 0 | 1 | 0 | 0 | 0 | 1 | 0 | 0 | 0 | 0 | 0 | 0 |
| DS-60353 | 1 | 1 | 0 | 0 | 1 | 0 | 0 | 0 | 1 | 0 | 0 | 0 | 0 | 0 | 0 |
| DS-49685 | 1 | 1 | 0 | 0 | 1 | 0 | 0 | 0 | 0 | 1 | 0 | 0 | 0 | 0 | 0 |
| DS-52122 | 1 | 1 | 0 | 0 | 1 | 0 | 0 | 0 | 0 | 1 | 0 | 0 | 0 | 0 | 0 |
| DS-52232 | 1 | 1 | 0 | 0 | 1 | 0 | 0 | 0 | 0 | 1 | 0 | 0 | 0 | 0 | 0 |
| DS-56376 | 1 | 1 | 0 | 0 | 1 | 0 | 0 | 0 | 0 | 1 | 0 | 0 | 0 | 0 | 0 |
| DS-56608 | 1 | 1 | 0 | 0 | 1 | 0 | 0 | 0 | 0 | 1 | 0 | 0 | 0 | 0 | 0 |
| DS-57829 | 1 | 1 | 0 | 0 | 1 | 0 | 0 | 0 | 0 | 1 | 0 | 0 | 0 | 0 | 0 |
| DS-48778 | 1 | 1 | 0 | 0 | 1 | 0 | 0 | 0 | 1 | 1 | 0 | 0 | 0 | 0 | 0 |
| DS-56309 | 1 | 1 | 0 | 0 | 1 | 0 | 0 | 0 | 1 | 1 | 0 | 0 | 0 | 0 | 0 |
| DS-50248 | 1 | 1 | 0 | 0 | 1 | 0 | 0 | 1 | 0 | 0 | 0 | 0 | 0 | 0 | 0 |
| DS-51528 | 1 | 1 | 0 | 0 | 1 | 0 | 0 | 1 | 0 | 0 | 0 | 0 | 0 | 0 | 0 |
| DS-51679 | 1 | 1 | 0 | 0 | 1 | 0 | 0 | 1 | 0 | 0 | 0 | 0 | 0 | 0 | 0 |
| DS-53146 | 1 | 1 | 0 | 0 | 1 | 0 | 0 | 1 | 0 | 0 | 0 | 0 | 0 | 0 | 0 |
| DS-56302 | 1 | 1 | 0 | 0 | 1 | 0 | 0 | 1 | 0 | 0 | 0 | 0 | 0 | 0 | 0 |
| DS-87902 | 1 | 1 | 0 | 0 | 1 | 0 | 0 | 1 | 0 | 0 | 0 | 0 | 0 | 0 | 0 |
| DS-49375 | 1 | 1 | 0 | 0 | 1 | 0 | 0 | 1 | 1 | 0 | 0 | 0 | 0 | 0 | 0 |
| DS-51680 | 1 | 1 | 0 | 0 | 1 | 0 | 0 | 1 | 1 | 0 | 0 | 0 | 0 | 0 | 0 |

|          |   |   |   |   |   |   |   |   |   |   |   |   |   |   |   |
|----------|---|---|---|---|---|---|---|---|---|---|---|---|---|---|---|
| DS-40199 | 1 | 1 | 0 | 0 | 1 | 0 | 0 | 1 | 0 | 1 | 0 | 0 | 0 | 0 | 0 |
| DS-54552 | 1 | 1 | 0 | 0 | 1 | 0 | 1 | 0 | 0 | 0 | 0 | 0 | 0 | 0 | 0 |
| DS-68634 | 1 | 1 | 0 | 0 | 1 | 0 | 1 | 0 | 0 | 0 | 0 | 0 | 0 | 0 | 0 |
| DS-50283 | 1 | 1 | 0 | 0 | 1 | 0 | 1 | 0 | 1 | 0 | 0 | 0 | 0 | 0 | 0 |
| DS-56660 | 1 | 1 | 0 | 0 | 1 | 0 | 1 | 0 | 0 | 1 | 0 | 0 | 0 | 0 | 0 |
| DS-54437 | 1 | 1 | 0 | 0 | 1 | 0 | 1 | 1 | 0 | 0 | 0 | 0 | 0 | 0 | 0 |
| DS-50613 | 1 | 1 | 0 | 0 | 1 | 1 | 0 | 0 | 0 | 0 | 0 | 0 | 0 | 0 | 0 |
| DS-51984 | 1 | 1 | 0 | 0 | 1 | 1 | 0 | 0 | 0 | 0 | 0 | 0 | 0 | 0 | 0 |
| DS-52979 | 1 | 1 | 0 | 0 | 1 | 1 | 0 | 0 | 0 | 0 | 0 | 0 | 0 | 0 | 0 |
| DS-53487 | 1 | 1 | 0 | 0 | 1 | 1 | 0 | 0 | 0 | 0 | 0 | 0 | 0 | 0 | 0 |
| DS-53710 | 1 | 1 | 0 | 0 | 1 | 1 | 0 | 0 | 0 | 0 | 0 | 0 | 0 | 0 | 0 |
| DS-55364 | 1 | 1 | 0 | 0 | 1 | 1 | 0 | 0 | 0 | 0 | 0 | 0 | 0 | 0 | 0 |
| DS-55377 | 1 | 1 | 0 | 0 | 1 | 1 | 0 | 0 | 0 | 0 | 0 | 0 | 0 | 0 | 0 |
| DS-56140 | 1 | 1 | 0 | 0 | 1 | 1 | 0 | 0 | 0 | 0 | 0 | 0 | 0 | 0 | 0 |
| DS-56963 | 1 | 1 | 0 | 0 | 1 | 1 | 0 | 0 | 0 | 0 | 0 | 0 | 0 | 0 | 0 |
| DS-57006 | 1 | 1 | 0 | 0 | 1 | 1 | 0 | 0 | 0 | 0 | 0 | 0 | 0 | 0 | 0 |
| DS-61205 | 1 | 1 | 0 | 0 | 1 | 1 | 0 | 0 | 0 | 0 | 0 | 0 | 0 | 0 | 0 |
| DS-53198 | 1 | 1 | 0 | 0 | 1 | 1 | 0 | 0 | 1 | 0 | 0 | 0 | 0 | 0 | 0 |
| DS-51531 | 1 | 1 | 0 | 0 | 1 | 1 | 0 | 1 | 0 | 0 | 0 | 0 | 0 | 0 | 0 |
| DS-50720 | 1 | 1 | 0 | 1 | 1 | 0 | 0 | 0 | 1 | 0 | 1 | 0 | 0 | 0 | 1 |
| DS-50877 | 1 | 1 | 0 | 1 | 1 | 0 | 1 | 0 | 0 | 0 | 0 | 0 | 0 | 0 | 0 |
| DS-55003 | 1 | 1 | 0 | 1 | 1 | 1 | 0 | 0 | 1 | 0 | 0 | 0 | 0 | 0 | 0 |
| DS-54758 | 1 | 1 | 0 | 1 | 1 | 1 | 0 | 0 | 1 | 1 | 0 | 0 | 0 | 0 | 0 |
| DS-51156 | 1 | 1 | 0 | 1 | 1 | 1 | 1 | 0 | 0 | 0 | 0 | 0 | 0 | 0 | 0 |
| DS-54160 | 1 | 1 | 0 | 1 | 1 | 1 | 1 | 1 | 0 | 0 | 0 | 0 | 0 | 0 | 0 |
| DS-48725 | 1 | 1 | 1 | 0 | 0 | 0 | 0 | 0 | 0 | 0 | 0 | 0 | 0 | 0 | 0 |
| DS-49116 | 1 | 1 | 1 | 0 | 0 | 0 | 0 | 0 | 0 | 0 | 0 | 0 | 0 | 0 | 0 |
| DS-49639 | 1 | 1 | 1 | 0 | 0 | 0 | 0 | 0 | 0 | 0 | 0 | 0 | 0 | 0 | 0 |
| DS-49716 | 1 | 1 | 1 | 0 | 0 | 0 | 0 | 0 | 0 | 0 | 0 | 0 | 0 | 0 | 0 |
| DS-50896 | 1 | 1 | 1 | 0 | 0 | 0 | 0 | 0 | 0 | 0 | 0 | 0 | 0 | 0 | 0 |
| DS-56647 | 1 | 1 | 1 | 0 | 0 | 0 | 0 | 0 | 0 | 0 | 0 | 0 | 0 | 0 | 0 |
| DS-68891 | 1 | 1 | 1 | 0 | 0 | 0 | 0 | 0 | 0 | 0 | 0 | 0 | 0 | 0 | 0 |
| DS-51202 | 1 | 1 | 1 | 0 | 1 | 0 | 1 | 0 | 0 | 1 | 0 | 0 | 0 | 0 | 0 |
| DS-54013 | 1 | 2 | 0 | 0 | 0 | 0 | 0 | 0 | 0 | 0 | 0 | 0 | 0 | 0 | 0 |
| DS-49695 | 1 | 3 | 0 | 0 | 1 | 0 | 0 | 0 | 1 | 1 | 0 | 1 | 0 | 1 | 1 |
| DS-56867 | 2 | 0 | 0 | 0 | 0 | 0 | 0 | 0 | 0 | 0 | 0 | 0 | 0 | 0 | 0 |
| DS-56998 | 2 | 0 | 0 | 0 | 0 | 0 | 0 | 0 | 0 | 0 | 0 | 0 | 0 | 0 | 0 |
| DS-57060 | 2 | 0 | 0 | 0 | 0 | 0 | 0 | 0 | 0 | 0 | 0 | 0 | 0 | 0 | 0 |
| DS-51918 | 2 | 0 | 0 | 0 | 1 | 0 | 0 | 0 | 1 | 0 | 0 | 0 | 0 | 0 | 0 |
| DS-53725 | 2 | 0 | 0 | 0 | 1 | 0 | 0 | 0 | 0 | 1 | 0 | 0 | 0 | 0 | 0 |
| DS-52815 | 2 | 0 | 0 | 1 | 1 | 0 | 0 | 0 | 1 | 0 | 0 | 0 | 0 | 0 | 0 |
| DS-51952 | 2 | 0 | 0 | 1 | 1 | 1 | 1 | 1 | 1 | 1 | 0 | 0 | 1 | 1 | 0 |
| DS-49699 | 2 | 1 | 0 | 0 | 1 | 1 | 0 | 0 | 0 | 0 | 0 | 0 | 0 | 0 | 0 |

|          |   |   |   |   |   |   |   |   |   |   |   |   |   |   |   |
|----------|---|---|---|---|---|---|---|---|---|---|---|---|---|---|---|
| DS-50776 | 2 | 1 | 0 | 0 | 1 | 1 | 1 | 1 | 1 | 0 | 0 | 0 | 1 | 1 | 1 |
| DS-59919 | 2 | 1 | 0 | 1 | 1 | 1 | 1 | 1 | 0 | 1 | 1 | 0 | 0 | 0 | 0 |

**Note that 0 = “No” and 1 = “Yes”.**

**Supplementary Table 6. Counts of *APC* truncating mutations by sample using the TCGA COAD data.**

|                                               |          |          |          |          |
|-----------------------------------------------|----------|----------|----------|----------|
| <b>No. of <i>APC</i> truncating mutations</b> | <b>0</b> | <b>1</b> | <b>2</b> | <b>3</b> |
| <b><i>APC</i> copy number change</b>          | 0        | 0        | 0        | 0        |
| <b>No. of samples</b>                         | 46       | 74       | 38       | 3        |

|                                               |          |          |          |
|-----------------------------------------------|----------|----------|----------|
| <b>No. of <i>APC</i> truncating mutations</b> | <b>0</b> | <b>1</b> | <b>2</b> |
| <b><i>APC</i> copy number change</b>          | -1       | -1       | -1       |
| <b>No. of samples</b>                         | 6        | 32       | 3        |

|                                               |          |          |          |
|-----------------------------------------------|----------|----------|----------|
| <b>No. of <i>APC</i> truncating mutations</b> | <b>0</b> | <b>2</b> | <b>0</b> |
| <b><i>APC</i> copy number change</b>          | +1       | +1       | -2       |
| <b>No. of samples</b>                         | 1        | 5        | 1        |

Notes: 209 total samples with somatic mutation, CAN, and expression data; 60.3% of total have 0 or 1 hits. Data downloaded from: [https://tcga-data.nci.nih.gov/docs/publications/coadread\\_2012/](https://tcga-data.nci.nih.gov/docs/publications/coadread_2012/)

**Supplementary Table 7. Immunohistochemical staining (Allred scores) of  $\beta$ -catenin in 52 CRCs.**

| <b>Barcode</b> | <b>Allred scores<br/>(nuclear)</b> | <b>Allred scores<br/>(cyto)</b> | <b>Allred scores<br/>(membranous)</b> |
|----------------|------------------------------------|---------------------------------|---------------------------------------|
| DS-33635       | 4                                  | 7                               | 7                                     |
| DS-48055       | 0                                  | 7                               | 7                                     |
| DS-48893       | 3                                  | 8                               | 8                                     |
| DS-49315       | 5                                  | 8                               | 7                                     |
| DS-50925       | 0                                  | 7                               | 8                                     |
| DS-51043       | 8                                  | 8                               | 0                                     |
| DS-51652       | 0                                  | 6                               | 8                                     |
| DS-51982       | 0                                  | 7                               | 8                                     |
| DS-53114       | 5                                  | 8                               | 8                                     |
| DS-53211       | 0                                  | 7                               | 8                                     |
| DS-54051       | 7                                  | 8                               | 8                                     |
| DS-54564       | 7                                  | 7                               | 4                                     |
| DS-54783       | 7                                  | 7                               | 5                                     |
| DS-56326       | 0                                  | 6                               | 7                                     |
| DS-47369       | 7                                  | 8                               | 8                                     |
| DS-48607       | 7                                  | 8                               | 7                                     |
| DS-48764       | 8                                  | 8                               | 6                                     |
| DS-49826       | 5                                  | 7                               | 7                                     |
| DS-51803       | 5                                  | 8                               | 7                                     |
| DS-51941       | 0                                  | 5                               | 8                                     |
| DS-52210       | 5                                  | 7                               | 8                                     |
| DS-52681       | 7                                  | 6                               | 6                                     |
| DS-52790       | 6                                  | 7                               | 7                                     |
| DS-52838       | 6                                  | 6                               | 8                                     |
| DS-52853       | 5                                  | 7                               | 8                                     |
| DS-53453       | 5                                  | 7                               | 7                                     |
| DS-54041       | 7                                  | 8                               | 5                                     |
| DS-58258       | 7                                  | 6                               | 7                                     |
| DS-67955       | 7                                  | 7                               | 5                                     |
| DS-67980       | 7                                  | 6                               | 7                                     |
| DS-70294       | 6                                  | 7                               | 7                                     |
| DS-40199       | 4                                  | 7                               | 8                                     |
| DS-44878       | 5                                  | 8                               | 7                                     |
| DS-48857       | 7                                  | 8                               | 5                                     |
| DS-49796       | 0                                  | 7                               | 8                                     |
| DS-50687       | 3                                  | 6                               | 7                                     |
| DS-51797       | 6                                  | 7                               | 7                                     |
| DS-51977       | 7                                  | 7                               | 6                                     |

|          |   |   |   |
|----------|---|---|---|
| DS-51997 | 6 | 7 | 7 |
| DS-52151 | 4 | 7 | 7 |
| DS-52320 | 7 | 8 | 4 |
| DS-53191 | 6 | 5 | 7 |
| DS-54129 | 6 | 7 | 7 |
| DS-54363 | 7 | 6 | 6 |
| DS-54589 | 5 | 7 | 7 |
| DS-56376 | 5 | 7 | 7 |
| DS-56963 | 0 | 7 | 8 |
| DS-58341 | 4 | 6 | 7 |
| DS-60296 | 7 | 6 | 6 |
| DS-60353 | 0 | 7 | 8 |
| DS-49639 | 5 | 8 | 7 |
| Ds-56293 | 2 | 7 | 8 |



**Supplemental Table 8. Five-class classification and CMS classification (N=458)**

| <b>Classes</b>                | <b>N</b> | <b>%CMS1</b> | <b>%CMS2</b> | <b>%CMS3</b> | <b>%CMS4</b> | <b>%NA</b> | <b>%Total</b> |
|-------------------------------|----------|--------------|--------------|--------------|--------------|------------|---------------|
| <b>0</b> “APCwt”              | 151      | 34 ↑↑↑       | 8 ↓↓↓        | 12           | 28           | 18         | 100           |
| <b>1</b> “A(1), A(1)K, A(1)P” | 138      | 6 ↓↓         | 36 ↑         | 13           | 24           | 21         | 100           |
| <b>2</b> “A(2), A(2)K, A(2)P” | 83       | 13           | 35           | 18           | 17           | 17         | 100           |
| <b>3</b> “APC(1)KP”           | 45       | 9            | 33           | 11           | 27           | 20         | 100           |
| <b>4</b> “APC(2)KP”           | 41       | 5            | 24           | 20           | 27           | 24         | 100           |

Note:

1) A-APC, K-KRAS, P-TP53

**Class 0:** APC wild type; **Class 1:** APC(1), APC(1)/KRAS, APC(1)/TP53; **Class 2:** APC(2), APC(2)/KRAS, APC(2)/TP53; **Class 3:** APC(1)/KRAS/TP53; **Class 4:** APC(2)/KRAS/TP53. While A(1) or APC (1) represents one APC mutation, A(2) or APC (2) represents two APC mutations.

2) ↑(↓) for  $p < 0.05$ ; ↑↑(↓↓) for  $p < 0.01$ ; ↑↑↑(↓↓↓) for  $p < 0.001$ ; based on individual chi-square contribution from the table cell.

**Supplementary Table 9. Cox model predictors of overall survival of MSS tumors (N=399)  
(Models 1-4)**

| Covariable                    | Model 1 |         | Model 2 |         |
|-------------------------------|---------|---------|---------|---------|
|                               | HR      | p-value | HR      | p-value |
| <i>APC</i>                    |         |         | 0.47    | 0.0008  |
| <i>BRAF</i>                   |         |         | 2.23    | 0.012   |
| 2 <i>APC</i> muts             |         |         | 1.63    | 0.019   |
| <i>AKP</i>                    |         |         | 1.45    | 0.08    |
| <b>Metastasis</b>             | 4.44    | <.0001  | 4.54    | <.0001  |
| <b>AGE(≥70)</b>               | 1.10    | <.0001  | 1.09    | <.0001  |
| <b>LR <math>\chi^2</math></b> | 75.7    | <.0001  | 98.8    | <.0001  |

| Covariable                    | Model 3 |         | Model 4 |         | Model 5 |         |
|-------------------------------|---------|---------|---------|---------|---------|---------|
|                               | HR      | p-value | HR      | p-value | HR      | p-value |
| <i>APC</i>                    |         |         | 0.52    | 0.003   | 0.62    | 0.015   |
| <i>BRAF</i>                   |         |         | 1.55    | 0.23    | 1.50    | 0.26    |
| 2 <i>APC</i> muts             |         |         | 1.57    | 0.034   |         |         |
| <i>AKP</i>                    |         |         | 1.37    | 0.14    |         |         |
| <i>APC(2)KP</i>               |         |         |         |         | 2.03    | 0.007   |
| <b>CMS1</b>                   | 3.48    | <.0001  | 2.39    | 0.012   | 2.55    | 0.007   |
| <b>CMS3</b>                   | 1.76    | 0.06    | 1.45    | 0.22    | 1.53    | 0.16    |
| <b>CMS4</b>                   | 1.34    | 0.22    | 1.24    | 0.37    | 1.24    | 0.37    |
| <b>CMS_NA</b>                 | 1.82    | 0.02    | 1.53    | 0.10    | 1.51    | 0.11    |
| <b>Metastasis</b>             | 4.99    | <.0001  | 4.86    | <.0001  | 4.82    | <.0001  |
| <b>AGE(≥70)</b>               | 1.09    | <.0001  | 1.09    | <.0001  | 1.09    | <.0001  |
| <b>LR <math>\chi^2</math></b> | 92.6    | <.0001  | 105.4   | <.0001  | 105.1   | <.0001  |

## Supplementary References

- 1 Samowitz, W. S. *et al.* APC mutations and other genetic and epigenetic changes in colon cancer. *Molecular cancer research : MCR* **5**, 165-170, doi:10.1158/1541-7786.MCR-06-0398 (2007).
- 2 Cancer Genome Atlas, N. Comprehensive molecular characterization of human colon and rectal cancer. *Nature* **487**, 330-337, doi:10.1038/nature11252 (2012).
- 3 Herbst, A. *et al.* Comprehensive analysis of beta-catenin target genes in colorectal carcinoma cell lines with deregulated Wnt/beta-catenin signaling. *BMC genomics* **15**, 74, doi:10.1186/1471-2164-15-74 (2014).
- 4 Dry, J. R. *et al.* Transcriptional pathway signatures predict MEK addiction and response to selumetinib (AZD6244). *Cancer research* **70**, 2264-2273, doi:10.1158/0008-5472.CAN-09-1577 (2010).
- 5 Loboda, A. *et al.* EMT is the dominant program in human colon cancer. *BMC Med Genomics* **4**, 9, doi:10.1186/1755-8794-4-9 (2011).
